# 1 **Ensemble cryo-EM structures demonstrate human IMPDH2 filament** 2 **assembly tunes allosteric regulation**

3  
4 Matthew C. Johnson and Justin M. Kollman\*  
5 Department of Biochemistry, University of Washington, Seattle, WA 98195  
6 \*correspondence: [jkoll@uw.edu](mailto:jkoll@uw.edu)

7

## 8 **Summary**

9 Inosine monophosphate dehydrogenase (IMPDH) mediates the first committed step in guanine  
10 nucleotide biosynthesis and plays important roles in cellular proliferation and the immune response. The  
11 enzyme is heavily regulated to maintain balance between guanine and adenine nucleotide pools. IMPDH  
12 reversibly polymerizes in cells and tissues in response to changes in metabolic demand, providing an  
13 additional layer of regulatory control associated with increased flux through the guanine synthesis  
14 pathway. Here, we report a series of human IMPDH2 cryo-EM structures in active and inactive  
15 conformations, and show that the filament resists inhibition by guanine nucleotides. The structures define  
16 the mechanism of filament assembly, and reveal how assembly interactions tune the response to guanine  
17 inhibition. Filament-dependent allosteric regulation of IMPDH2 makes the enzyme less sensitive to  
18 feedback inhibition, explaining why assembly occurs under physiological conditions, like stem cell  
19 proliferation and T-cell activation, that require expansion of guanine nucleotide pools.

## 20 **Introduction**

21 Ribonucleotides play a central role in cellular physiology, and complex regulatory networks maintain  
22 optimal nucleotide levels according to the variable metabolic state of the cell (Lane & Fan 2015). Under  
23 most conditions, cells rely on salvage pathways to regenerate degradation products and maintain  
24 nucleotide pools. However when nucleotide demand is high, for example during cellular proliferation, flux  
25 through de novo nucleotide biosynthesis pathways is up-regulated.

26 The universally conserved enzyme IMP dehydrogenase (IMPDH) catalyzes the first committed step in  
27 guanine nucleotide synthesis. Initiation of purine nucleotide biosynthesis is tightly regulated by  
28 downstream adenine and guanine nucleotide products. Balancing the flux through these parallel  
29 synthesis pathways, which share the precursor inosine monophosphate (IMP), is essential for cellular  
30 homeostasis (Fig 1A) (Allison & Eugui 2000). IMPDH is regulated transcriptionally, post-translationally,  
31 and allosterically (Hedstrom 2009). In vertebrates, two IMPDH isoforms, (83% identical in humans), have  
32 differential expression patterns (Collart & Huberman 1988; Natsumeda et al. 1990). IMPDH1 is  
33 constitutively expressed at low levels in most tissues, while IMPDH2 is generally upregulated in  
34 proliferating tissues (Senda & Natsumeda 1994; Jackson et al. 1975; Hager et al. 1995; Carr et al. 1993).  
35 In mice, knockout of IMPDH1 results in only very minor vision defects, whereas knockout of IMPDH2 is  
36 embryonic lethal (Gu et al. 2003; Aherne et al. 2004; Gu et al. 2000).

37 IMPDH reversibly assembles into filaments in vertebrate cells and tissues, providing an additional layer  
38 of regulation. Guanine deprivation induces assembly of IMPDH into micron-scale ultrastructures  
39 composed of bundled filaments, which disassemble once homeostasis is restored (Labesse et al. 2013;  
40 Calise et al. 2014; Thomas et al. 2012; Juda et al. 2014). Additional stimuli that alter IMPDH catalytic flux  
41 result in assembly, including increased intracellular IMP, and treatment with IMPDH inhibitors or other  
42 anti-proliferative drugs (Keppeke et al. 2018; Chang et al. 2015; Ji et al. 2006; Keppeke et al. 2015). In  
43 vivo, IMPDH assembly is seen mainly in cases of high nucleotide demand, for example assembly is  
44 correlated with proliferation of mouse induced pluripotent stem cells and human T-cell activation  
45 (Keppeke et al. 2018; Duong-Ly et al. 2018; Calise et al. 2018). However, the molecular mechanisms  
46 that underlie assembly-dependent regulation of IMPDH have not been described.

47 The catalytic mechanism and the structures of IMPDH monomers and defined oligomers are well-  
48 described (Hedstrom 2009). IMPDH forms stable tetramers, each protomer consisting of a catalytic  
49 domain and a regulatory Bateman domain (Fig 1B). The enzyme converts IMP to xanthosine  
50 monophosphate (XMP) and requires  $\text{NAD}^+$  as a cofactor for a complex multi-stage catalysis requiring  
51 rearrangements of active site loops that close around the substrate upon binding, and then must reopen  
52 to allow release of product. The regulatory domain contains three allosteric sites that bind adenine and  
53 guanine nucleotides. Sites 1 and 2 are canonical cystathionine beta synthase motifs that bind either  
54 ATP/ADP or GTP/GDP, and are conserved among IMPDH homologues (Scott et al. 2004; Ignoul &

55 Eggermont 2005; Baykov et al. 2011; Ereño-Orbea et al. 2013). Site 3 is a non-canonical site located at  
56 the interface between domains that binds only GTP/GDP (Buey, Ledesma-Amaro, Velázquez-Campoy,  
57 et al. 2015).

58 In eukaryotes, adenine and guanine nucleotides allosterically modulate IMPDH activity by altering  
59 oligomeric state (Buey et al. 2017; Fernández-Justel et al. 2019). IMPDH tetramers reversibly assemble  
60 into octamers when nucleotides bind the two canonical sites and drive dimerization of Bateman domains  
61 (Fig 1C). Bound adenines promote an extended conformation in which the active sites are free to open  
62 and close as needed for catalysis. GTP/GDP binding induces a compressed conformation by changing  
63 the relative orientation of the two domains. This brings the active sites of opposing tetramers tightly  
64 together, forming an interdigitated pseudo beta-barrel that prevents reopening and product release and  
65 inhibits IMPDH activity by a mechanism described as a “conformational switch” between extended and  
66 compressed states (Buey, Ledesma-Amaro, Velázquez-Campoy, et al. 2015; Buey et al. 2017;  
67 Fernández-Justel et al. 2019). Because inhibition requires interactions between two opposing tetramers,  
68 this switch is functionally relevant in only the octameric state.

69 In vitro treatment with ATP or GTP induces assembly of human IMPDH into filaments composed of  
70 stacked octamers interacting through their catalytic domains (Fig. 1D) (Labesse et al. 2013; Anthony et  
71 al. 2017; Fernández-Justel et al. 2019). Filament segments can both extend and compress, and  
72 assembly does not have a direct effect on the activity of IMPDH2 (Anthony et al. 2017). Importantly,  
73 mutations that block assembly of IMPDH filaments in vitro also prevent assembly of the large IMPDH  
74 bundles observed in cells, supporting the functional relevance of in vitro reconstituted filaments.

75 In this study, we present a series of near-atomic resolution cryo-electron microscopy (cryo-EM) structures  
76 of human IMPDH2. Structures of the enzyme treated with multiple combinations of substrates (IMP,  
77 NAD<sup>+</sup>) and allosteric effectors (ATP, GTP), in both filament and non-filament assembly states,  
78 demonstrate the extreme conformational plasticity of the enzyme. These structures define the  
79 interactions that drive filament assembly, and we show that in vitro IMPDH2 filament assembly is sensitive  
80 to the same conditions that promote assembly in cells: high IMP levels and low guanine nucleotide levels  
81 (Keppeke et al. 2018). Finally, we show that filament assembly tunes sensitivity to GTP inhibition by  
82 stabilizing a conformation that reduces affinity for GTP.

83

## 84 **Results**

### 85 ***IMPDH2 filaments are conformationally heterogeneous***

86 We first characterized IMPDH2 filaments assembled in vitro by addition of ATP (Anthony et al. 2017).  
87 The affinity of IMPDH2 for ATP has not been directly measured but we found ATP concentrations as low  
88 as 1  $\mu$ M sufficient to induce assembly (Fig. 2A). We prepared cryo-EM grids of ATP-assembled filaments  
89 and found that in the absence of other ligands, IMPDH2 filaments are extremely flexible (Fig. S2A). Two-  
90 dimensional class averages confirmed our prior observation from negative stain that the filaments are  
91 composed of conformationally heterogeneous octamers stacked head-to-head, resulting in flexible  
92 filaments with variable rise and radius of curvature (Fig. 2B). Because these deviations from ideal helical  
93 symmetry severely limited attempts at image processing by traditional iterative helical real-space  
94 reconstruction, we attempted to produce more structurally homogeneous filaments by addition of IMP or  
95  $\text{NAD}^+$ , which stabilize the flexible active site loops (Sintchak et al. 1996). As previously reported,  
96 substrates did not have a direct effect on IMPDH2 filament assembly, and filament assembly did not  
97 directly affect enzymatic activity (Figs. 2C-D). Unfortunately, addition of IMP and  $\text{NAD}^+$ , either alone or in  
98 combination, did not significantly reduce filament flexibility (Fig. S1B-D). Two-dimensional class averages  
99 of helical segments again exhibited varying degrees of curvature and showed no correlation of structural  
100 states between neighboring IMPDH2 octamers, preventing successful three-dimensional processing with  
101 conventional helical approaches (Figs 2E-G).

102 From these 2D class averages we observed that filament flexibility was due to variations in the  
103 conformation of filament segments, but that the interface between segments did not vary, and as a  
104 consequence this region was better resolved (Fig. 3A). Focused refinement of the filament assembly  
105 interface region alone provided a valuable foothold in resolving high resolution structures of all regions  
106 of the filaments. We developed a workflow for a single-particle style approach to reconstruction of  
107 inherently heterogeneous helical protomers, combining density subtraction, symmetry expansion,  
108 focused classification and focused refinement to isolate, classify, and reconstruct discrete sections of  
109 filaments for structural characterization (Fig. S1E-G). This approach provided multiple structures for two  
110 different focused regions of IMPDH2 filaments: full octameric segments, and the paired catalytic domain  
111 tetramers that constitute the filament assembly interface (Fig. 3B).

### 112 ***The IMPDH2 filament assembly interface is well-ordered***

113 To define the interactions that drive assembly of catalytically active IMPDH2 filaments, we obtained cryo-  
114 EM structures of IMPDH2 in three liganded states: 1) ATP/IMP/ $\text{NAD}^+$ , 2) ATP/ $\text{NAD}^+$ , and 3) ATP/IMP.  
115 The three datasets were qualitatively similar. However, because the structures refined to higher  
116 resolution when both substrates were present, we focus our analysis here on the ATP/IMP/ $\text{NAD}^+$  dataset.  
117 The complete image processing workflow applied to this dataset (Fig. S2A) was also applied to the two



118 single-substrate datasets. From the ATP/IMP/NAD<sup>+</sup> data we resolved many different structural classes,  
119 three of which reached high resolution: the filament assembly interface, and two different reconstructions  
120 of octameric filament segments (Table 1). We resolved many conformations of filament segments,  
121 however for all segments the filament assembly interface was identical. Therefore the filament assembly  
122 interface structure is a dataset consensus structure, an average of every segment included in the dataset.  
123 We did not observe any conformational cooperativity in the compressed/extended conformational  
124 equilibrium between IMPDH2 octamers sharing a filament assembly interface.

125 We determined the structure of the ATP/IMP/NAD<sup>+</sup> consensus filament assembly interface at 3.0 Å  
126 resolution (Figs. 3C, S2B-C). This D4 symmetric region is composed of two symmetrically opposed  
127 catalytic domain tetramers. The interface between tetramers is formed by the 12 amino-terminal residues  
128 of eight protomers, which each extend from the core of the molecule to bind one catalytic domain on the  
129 opposite tetramer, in a shallow surface groove formed by a short helix (476-485), two beta strands (51-  
130 63), and two short loops (355-360, 379-380) (Fig. 3D). A key tyrosine/arginine interaction (Y12/R356')  
131 anchors the attachment; mutation of either of these residues to alanine was previously shown to abolish  
132 assembly, both in vivo and in vitro (Anthony et al. 2017). Residues 1-7 make mostly hydrophobic  
133 interactions with the catalytic domain, and an embedded arginine (R480') is positioned to hydrogen bond  
134 to the I6 backbone carbonyl. These interactions are reciprocal - a protomer extends its N-terminus to a  
135 partner and receives the N-terminus of the same partner, creating four pairs of symmetrical interactions  
136 at the interface. The overall surface area buried by a single interaction is 2,300 Å<sup>2</sup>, with a total buried  
137 area of 9,200 Å<sup>2</sup> for the multimeric interface.

138 The N-terminal tail of IMPDH, corresponding to residues 1-28 in IMPDH2, is the least conserved part of  
139 the protein, with large variation in length and sequence between phyla, as well as conformational variation  
140 among known structures (Fig. S3A) (Trapero et al. 2018; Makowska-Grzyska et al. 2015; Kim et al. 2017;  
141 Prosis & Luecke 2003; Osipiuk et al. 2014; Labesse et al. 2013; Buey, Ledesma-Amaro, Balsera, et al.  
142 2015; Fernández-Justel et al. 2019). The residues involved in filament contacts, however, are conserved  
143 among chordates, consistent with the fact that IMPDH polymerization has only been reported in  
144 vertebrates (Fig. S3B). In previous crystal structures of human and fungal IMPDH, residues 1-11 are  
145 unresolved and residues 12-28 are well resolved. In these structures, Asp16 anchors the tail in place  
146 through ionic interactions with Arg341/Lys349 of a neighboring protomer, while Val13 and Pro14 make  
147 hydrophobic contacts. In the filament structure, however, the Val13/Pro14 contacts are broken and the  
148 entire tail is rotated about 30° to position Tyr12 to contact Arg356 across the filament interface (Fig. S3C).

149 In this consensus structure, the remainder of the catalytic domain is nearly identical to a structure of  
150 human hIMPDH2 bound to competitive inhibitors in a previously determined crystal structure (PDB 1nf7,  
151 backbone RMSD 0.641 Å for residues 18-107, 245-417, & 439-514) (Sintchak et al. 1996). The active  
152 site is well-resolved, except for one loop (residues 421-436). There is strong density in the both the IMP  
153 and NAD<sup>+</sup> binding sites. We have modelled these ligands as IMP and NAD<sup>+</sup>, however because the

154 enzyme filaments were actively turning over when flash frozen, we have likely captured a mixture of  
155 substrate-, intermediate-, and product-bound states. Attempts at focused classification of the active site  
156 to structurally isolate these states were unsuccessful.

### 157 ***The extended conformation is an ensemble of flexible states***

158 We resolved multiple conformations of filament segments in the ATP/IMP/NAD<sup>+</sup> dataset (Fig. S2D). The  
159 most well-resolved was a D4-symmetric, fully extended octamer (3.3 Å, Figs. 3E, S2E-H). The eight  
160 Bateman domains are symmetrically extended with respect to their catalytic domains, giving the  
161 octameric segment a helical rise of 118 Å; a symmetric helix of these segments would have a twist of  
162 36°. There is strong density at both of the canonical ATP-binding sites within the Bateman domain (Fig.  
163 3F), consistent with previous crystal structures of ATP/ADP-bound fungal and bacterial IMPDH (Buey et  
164 al. 2017; Labesse et al. 2013).

165 We also resolved several bent filament segment structures, the best resolved of which reached 3.9 Å  
166 (Figs. 3G, S2I-L). This bent octamer contains two identical tetramers. For each, three protomers are in  
167 extended conformations, while one protomer is in the compressed conformation. Due to the symmetry of  
168 the octamer, the lone compressed protomer of each tetramer forms a Bateman domain dimer with an  
169 extended protomer of the opposing tetramer (Fig. 3H, Fig. S3D). From each of the lower resolution  
170 ATP/IMP and ATP/NAD<sup>+</sup> datasets, we also observed a single consensus filament assembly interface and  
171 many different filament segment classes, including fully extended and bent segments, as well as fully  
172 compressed segments (Figs. 3I-J, Tables 2-3). To our knowledge, these are the first structure of IMPDH  
173 in the compressed conformation in the absence of guanine nucleotides. While the two canonical ATP  
174 sites are occupied, the third Bateman binding site (which forms only in the compressed state and is  
175 GTP/GDP-specific) remains unoccupied. This suggests that protomers within ATP-bound IMPDH  
176 filaments readily sample the compressed conformation, and that GTP binding to site 3 selectively  
177 stabilizes this state. Further, the ability of a compressed protomer to form a Bateman dimer with an  
178 extended partner demonstrates a lack of conformational cooperativity across the Bateman domain  
179 interface.

### 180 ***The balance of substrate and downstream product regulates filament assembly***

181 We and others previously reported that GTP can stabilize compressed IMPDH2 filaments or drive their  
182 disassembly, depending on what other ligands are present (Buey et al. 2017; Anthony et al. 2017; Duong-  
183 Ly et al. 2018). To understand how ligand status of the active site tunes the response to GTP, we  
184 systematically explored the effects of different ligand combinations on filament assembly. In the absence  
185 of substrate, GTP induces disassembly of filaments, but as little as 10 μM IMP inhibits disassembly (Figs.  
186 4A-B). Pre-treatment of filaments with IMP prevents disassembly by GTP, and addition of IMP promotes  
187 reassembly of filaments previously disassembled by GTP (Figs. S4A-B).

188 To understand how IMP and GTP allosterically influence filament assembly and disassembly of ATP-  
189 bound IMPDH2, we acquired cryo-EM data of the enzyme in two ligand states: 1) ATP/GTP/IMP, and 2)  
190 ATP/GTP. To ensure morphological consistency, we sought to saturate the enzyme with GTP. For the  
191 ATP/GTP dataset, we used 2 mM GTP, which for both our initial negative stain experiments and cryo-  
192 EM preparations resulted in complete disassembly of filaments into free octamers (Fig. S4C). However,  
193 under saturating IMP concentrations, 2 mM GTP resulted in filaments that were often bent (Fig. S4D).  
194 This should not be possible if GTP were saturating all sites; our structures above suggest bent filaments  
195 must contain some extended protomers whose GTP-binding allosteric site 3 is disrupted. For the  
196 ATP/GTP/IMP cryo-EM dataset we therefore used a much higher GTP concentration (20 mM), which  
197 resulted in filaments with fully compressed segments (Fig. S4E). We explore this apparent difference in  
198 GTP affinity in more detail below.

199 The compressed filament dataset resulted in three high-resolution reconstructions: the consensus  
200 filament assembly interface, a fully compressed octameric filament segment, and a fully compressed  
201 octameric end segment (Fig. S5A, Table 4). The ATP/GTP/IMP filament assembly interface map (3.0 Å)  
202 is identical (backbone RMSD=0.407) to the ATP/IMP/NAD<sup>+</sup> filament interface (Figs. S5B-C). Classifying  
203 the most well-resolved filament segments as before, we obtained a 3.2 Å structure of a fully compressed  
204 filament segment (Figs. 4C, S5D-H). The Bateman domains are symmetrically compressed, with ligand  
205 density at all three allosteric sites. The active site is well resolved, including the canonical interactions  
206 between opposing active site fingers that inhibit catalysis by preventing catalytic dynamics (Buey et al.  
207 2017).

208 Compared to the uninhibited filament datasets, these GTP-saturated, +IMP filaments were shorter in  
209 length. As a result, in addition to filament segments, we identified many filament ends: octamers in which  
210 one tetramer does not have an assembled interface. The best-resolved structure of these filament ends  
211 (3.3 Å) is conformationally similar to the filament segments, being fully compressed, with well-resolved  
212 IMP-bound active sites in the inhibited conformation; however, without the filament assembly interface,  
213 the N-terminus is only partially resolved (Figs. 4D, S5I-L).

214 From the free octamer dataset containing ATP/GTP, we used a similar symmetry-expansion and  
215 classification strategy to that used for the filament datasets (Fig S6A). This scheme confirmed that  
216 virtually all the particles were symmetric, fully compressed free octamers in which both potential filament  
217 assembly interfaces are unbound, with some poorly resolved minority classes of larger oligomers (Fig.  
218 S6B-C). The best resolved free octamer class reached intermediate resolution (4.5 Å) (Figs. 4E, S6D-F,  
219 Table 5). This octamer is conformationally similar (backbone RMSD = 0.978 Å) to a recent higher-  
220 resolution crystal structure of IMPDH2 bound to GTP (PDB 6i0o) (Buey et al. 2017; Fernández-Justel et  
221 al. 2019). The Bateman domains are fully compressed with three occupied allosteric sites. Without IMP  
222 present, the active site loops of the free octamers are disordered, with partial density for the fingers  
223 extending across to the opposing tetramer.

224 Whether in a filament segment, filament end, or free octamer, the Bateman domains of the three  
225 ATP/GTP-bound IMPDH octamer types are fully compressed, with ligand density in all regulatory sites  
226 including the critical GTP/GDP-specific third site, which “staples” IMPDH octamers in the fully  
227 compressed, inhibited conformation. But we observed two key structural differences that correlated with  
228 assembly state: the conformation of the N-terminus, and the relative orientation of protomers within each  
229 tetramer. The filament interface of the inhibited segments is unchanged from the uninhibited filaments  
230 (Fig. 4F). However, at the free filament ends the N-terminus is only partially unresolved (a.a. 1-11), with  
231 the resolvable portion rotated  $\sim 30^\circ$  degrees compared to the bound interface, such that Val13 inserts into  
232 the shallow hydrophobic pocket formed by A307, A308, and Lys311 of the neighboring protomer, very  
233 similar to its position in the GTP-bound free octamer crystal structure (PDB 6i0o) (Fig. 4G) (Fernández-  
234 Justel et al. 2019). The resolution of the free octamer structure precludes side chain placement, but the  
235 backbone density of the unbound N-terminus is in the same position, indicating that free filament ends  
236 and free octamers are in the same conformation (Fig. 4H).

237 We noticed a striking difference between the conformation of the catalytic core assembly in free versus  
238 assembled states. Each protomer of the free octamer and at filament ends is tilted  $\sim 5^\circ$  relative to the  
239 four-fold symmetry axis, such that the tetramer becomes more “bowed” than the “flat” tetramers at  
240 filament assembly interfaces (Fig. 4I, Video S1). The tetramers found in the GTP-bound free octamer  
241 crystal structure (PDB 6i0o) are in a similar bowed conformation (Fernández-Justel et al. 2019). The  
242 bowed tetramer conformation and the filament assembly interface are mutually exclusive. When the N-  
243 terminus conformation from the free octamer is modeled into the flat tetramer of the filament assembly  
244 interface, V13 is not correctly positioned to bind the A307/A308/K311 of the neighboring protomer, and  
245 instead clashes with K311 and A307 (Fig. S7A). Thus the flat conformation promotes release of the N-  
246 termini from their binding sites on neighboring protomers, freeing them to rotate into the conformation  
247 seen in the assembled filament interface. The reciprocal operation is also not possible; for a bowed  
248 tetramer modelled with the N-terminus conformation from the filaments, only one protomer at a time can  
249 form the assembled interface (Fig. S7B). The other N-termini are out of position, with significant  
250 separation of the critical residues Y12 and R356 as well as multiple steric clashes. Thus bowed tetramers  
251 cannot form the IMPDH2 filament assembly interface, and tetramer flattening is a necessary precondition  
252 for IMPDH2 filament assembly (Fig. 4J).

253 These three structures of inhibited IMPDH2 conformations provide a model by which filament assembly  
254 is influenced by IMP and GTP through tetramer bowing and flattening (Fig 4K). In the absence of  
255 substrate, GTP induces both compression of filament segments and tetramer bowing, with the latter  
256 resulting in filament disassembly. But when IMP is bound, the disordered active site loops become  
257 ordered and rigid, buttressing intra-tetramer contacts as well as forming a pseudo-beta-barrel between  
258 opposing tetramers in the GTP-bound state. These increased contacts work to resist tetramer bowing  
259 and more readily sample the flat tetramer conformation, which promotes, and is stabilized by, the filament

260 assembly interface. When IMP levels are low, GTP promotes filament disassembly, but high IMP levels  
261 shift the equilibrium towards filament assembly.

### 262 ***IMPDH2 filaments resist GTP inhibition***

263 Based on this model, during quiescence, when the salvage pathways supply ample GTP and IMP  
264 production is downregulated, intracellular IMPDH2 will be in the fully compressed, fully inhibited,  
265 ATP/GTP-bound free octamer state. Without increased IMP production, guanine depletion will result in  
266 transient octamer extension and filament assembly, both of which will reverse as the resulting increase  
267 in IMPDH flux restores guanine levels by diverting substrate from the parallel de novo adenine pathway,  
268 mirroring the extension/compression behavior of non-filament assembling homologues (Fernández-  
269 Justel et al. 2019; Buey et al. 2017). Recently, it was shown that in vivo IMPDH assembly is promoted  
270 by increases in intracellular IMP (Keppeke et al. 2018). We therefore reasoned that the primary regulatory  
271 function of filament assembly may apply only in the proliferative state, when intracellular IMP levels are  
272 upregulated, preventing filament disassembly by GTP.

273 To probe whether filament assembly influences the regulatory effects of GTP on IMPDH2 activity we  
274 compared enzyme kinetics of the wildtype enzyme with the non-assembling mutant Y12A. We measured  
275 the GTP dose-response of IMPDH2 pre-incubated with varying levels of ATP, and found that wild-type  
276 enzyme is less sensitive to GTP inhibition, compared with Y12A (Figs. S8A-C). Depending on ATP  
277 concentration, the apparent GTP IC<sub>50</sub> of the wild-type was roughly two-fold lower than for Y12A. At  
278 higher ATP levels, the apparent GTP IC<sub>50</sub> of WT and the non-assembly mutant both increase. We  
279 attribute this to competition between ATP and GTP at the first and second Bateman sites, suggesting  
280 that independent of filament assembly, GTP inhibition of IMPDH2 is affected by ATP. Notably, the range  
281 of GTP in which the substrate-saturated filaments resist GTP inhibition is within the upper range of in vivo  
282 concentrations (Traut 1994). One function, then, of IMPDH2 filaments is to resist inhibition by GTP.

283 To correlate structural differences in IMPDH2 filaments as a function of GTP concentration, we collected  
284 negative stain EM data directly from three reaction volumes used for the GTP inhibition experiments,  
285 corresponding to uninhibited filaments (no GTP), ~10% inhibited filaments (2.5 mM GTP), and fully  
286 inhibited filaments (20 mM GTP) (Fig. 5A). As in the cryo-EM datasets, we found that uninhibited filaments  
287 were often extended, and fully inhibited filaments were universally compressed. However, we noted that  
288 the partially inhibited filaments contained a more heterogeneous mix of extended, bent, and compressed  
289 segments.

290 Next, we compared NAD<sup>+</sup> kinetics of uninhibited (0 mM GTP) and partially inhibited (2 mM GTP) filaments  
291 with saturating IMP concentrations (Figs. 5B-C). As expected, in the absence of GTP WT and the non-  
292 assembling mutant have similar apparent Michaelis-Menton kinetics (Anthony et al. 2017). Inhibition of  
293 WT by this concentration of GTP is partial and non-competitive. In contrast, the non-assembling mutant



294 is strongly inhibited. In the absence of saturating IMP, these same GTP levels result in complete octamer  
295 compression and filament disassembly, providing a possible mechanism by which filament assembly  
296 alters GTP inhibition: by resisting the fully compressed state.

297 To better understand this partially inhibited state, we collected cryo-EM data of IMPDH2 with saturating  
298 substrates, 0.5 mM ATP, and 2 mM GTP (Figs. S8D). Under these conditions we observed the non-  
299 assembly mutant Y12A was 84% inhibited but WT enzyme was only 16% inhibited. We resolved to high  
300 resolution structures of not only the filament assembly interface and several distinct filament segments,  
301 but surprisingly, two different free octamers; a canonical free octamer (a dimer of tetramers bound by  
302 Bateman domains), and also a small class of free interfacial octamers (a dimer of tetramers bound by  
303 the filament assembly interface) (Figs. S8E, S9A, Table 6).

304 The 3.1 Å resolution consensus assembly interface map is identical to the uninhibited and fully inhibited  
305 consensus interfaces, including a well-resolved active site with strong density for both substrates; as with  
306 the ATP/IMP/NAD<sup>+</sup> structures these filaments are actively turning over and we have likely captured many  
307 states, which we have modelled simply as IMP/NAD<sup>+</sup> (Figs S9B-C, S12A). As expected, the filament  
308 segments exhibited a range of conformations (Fig. S9D). The best resolved of these were a fully  
309 compressed filament segment at 3.4 Å resolution, and two bent conformations at 4.2 and 3.7 Å resolution  
310 (Figs. S9E-M). The fully compressed filament segment is identical to the corresponding structure from  
311 the inhibited (20 mM GTP) filament dataset, with all Bateman binding sites occupied (Fig. S12B). As with  
312 the bent conformation from the ATP/IMP/NAD<sup>+</sup> dataset, the two bent filament segments are each two-  
313 fold symmetric octamers of asymmetric tetramers containing different proportions of extended or  
314 compressed protomers (Figs. S12C-D). The asymmetric unit from one of these bent segments is a  
315 tetramer with two compressed and two extended protomers, and the other has three compressed and  
316 one extended. For each of the compressed protomers, there is clear ligand density bound at Bateman  
317 Site 3; for the extended protomers this site is unformed and empty.

318 Unlike the mixture of extended and compressed protomers we observed in the filaments, the free  
319 canonical octamers were universally compressed (Fig. S10A-C). As with the ATP/GTP free octamer, the  
320 best resolved canonical free octamer class (3.8 Å) is fully compressed and bowed, despite having both  
321 substrate sites occupied (Figs. S10D-F, S12E). Thus, even in the IMP-bound state, the compressed/flat  
322 conformation is less preferred, unless stabilized by the filament assembly interface. The small class of  
323 free interfacial octamers (3.8 Å) was no different from the filament interface maps, except that the  
324 Bateman domains are completely unresolved, indicating that without the stabilization provided by  
325 Bateman domain dimerization, these regions are highly flexible (Figs. S11A-F, S12F). The observation  
326 of dramatically different structural ensembles in filament-bound and free IMPDH2, in the presence of  
327 identical ligand concentrations, explains the role of filament assembly in resisting compression and GTP  
328 inhibition.

### 329 ***Filament-specific IMPDH2 conformations reduce GTP affinity and promote activity***

330 From our different cryo-EM datasets combined, we have now determined structures of canonical IMPDH2  
331 octamers bound to allosteric effectors and both substrates, in six distinct conformations (Fig. 5D). From  
332 the uninhibited ATP/IMP/NAD<sup>+</sup> dataset we resolved a fully extended filament segment, and a bent  
333 segment in which for each tetramer, 3 protomers were extended and 1 was compressed. From the  
334 partially inhibited GTP/ATP/IMP/NAD<sup>+</sup> dataset, we resolved 2:2, 3:1, and fully compressed filament  
335 segments, and a fully compressed free octamer. These five structures provide a mechanism by which  
336 the Bateman domain extension of discrete protomers promoted by filament assembly resists GTP  
337 inhibition (Fig 5E). Depending on the degree of extension/bending/compression, filament segments  
338 exhibit a range of increasingly stronger interactions between opposing catalytic domains. For the fully  
339 extended segments, there are no interactions, and the flexible active loops are able to perform the  
340 complex conformational changes necessary for catalysis (Hedstrom 2009; Buey et al. 2017). Going  
341 through the progressively more compressed bent states, there is progressively greater surface area  
342 buried by a series of distinct contacts between the opposing active site loops, until the fully compressed  
343 filament segment. For the active sites that make these contacts, activity is likely impaired because the  
344 active site loops are constrained. However, the presence of some unconstrained active sites in the bent  
345 filament segments means that these protomers are catalytically active. This effect is not cooperative  
346 within the octamers, and even a single extended protomer is sufficient to reduce inhibitory active site  
347 contacts.

348 The Bateman domain ligand occupancy of these five filament segment conformations varies significantly.  
349 Given the resolution range of these structures (3-4 Å) it is not possible to unequivocally distinguish ATP  
350 from GTP, and we have assigned ligand identity according to previous structures of a bacterial IMPDH  
351 bound to ATP (PDB 4dqw) (Labesse et al. 2013) and a fungal IMPDH bound to ADP and GTP (PDB  
352 5tc3) (Buey et al. 2017) (Fig. S14C). These were chosen due to conformational similarity of the Bateman  
353 domains of these structures to our ATP/IMP/NAD<sup>+</sup> fully extended and ATP/IMP/GTP fully compressed  
354 human filament cryo-EM structures; backbone RMSDs were 1.163 and 0.856 Å, respectively (for residues  
355 corresponding to human IMPDH2 residues 110-244). As previously described, in both the fully  
356 extended and 1:3 compressed:extended segments there is clear ligand density at Bateman sites 1 and  
357 2 (Fig. 5F). For the single compressed protomer in the latter, site 3 is formed but due to the absence of  
358 GTP in that dataset it is unoccupied. In the partially inhibited filament dataset, for which the buffer  
359 contained both ATP and GTP, we see a greater variation in Bateman ligand occupancy. For the 2:2  
360 compressed:extended segment, there is full occupancy at sites 1, 2, and 3 in the compressed protomers,  
361 however for the two extended protomers there is strong density at site 1 and partial density at site 2. The  
362 3:1 compressed:extended segment is qualitatively similar; the three compressed protomers possess full  
363 ligand occupancy but for the one extended protomer site 2 has only partial density. For both the fully  
364 compressed filament segment and the free octamer there is full ligand density. Thus filament assembly



365 promotes the extended state of individual protomers, which reduces overall GTP affinity due to disruption  
366 of site 3.  
367

## 368 Discussion

369 Understanding the complex ways cells regulate IMPDH activity to efficiently maintain spatiotemporal  
370 control of nucleotide levels in response to varying demand has direct implications for human health.  
371 IMPDH activity is upregulated to increase guanine levels in proliferating tissues like tumors and  
372 regenerating liver (Tressler et al. 1994; Yalowitz & Jayaram 2000; Huang et al. 2018; He et al. 2018;  
373 Nagai et al. 1991). IMPDH plays a particularly important role in the immune response, where T-cell  
374 activation is dependant on increased production of purine nucleotides, and is associated with IMPDH  
375 filament assembly (Gu et al. 2000; Zimmermann et al. 1998; Duong-Ly et al. 2018; Calise et al. 2018).  
376 As a result, IMPDH is the target of several drugs used in immunosuppressive treatment of both  
377 autoimmune disease and organ transplant rejection, and is considered a promising target for  
378 antineoplastic agents (Shu & Nair 2008; Liao et al. 2017; Bergan et al. 2016).

379 Assembly and disassembly of IMPDH into filaments has been observed in healthy proliferative cells, and  
380 in cancer cells (Keppeke et al. 2018; Wolfe et al. 2019). IMPDH filaments reversibly assemble in  
381 stimulated T-cells as they transition to a proliferative state, in a mechanism dependent on multiple  
382 metabolic signaling pathways and on the levels of guanine nucleotides (Duong-Ly et al. 2018; Calise et  
383 al. 2018). Despite the importance of understanding human IMPDH regulation, until now the regulatory  
384 role of IMPDH filament assembly has not been explored at the structural level.

385 We propose a model that describes the regulatory role of human IMPDH2 filament assembly, in which  
386 assembly reduces feedback inhibition of enzyme activity in a substrate-dependant manner, increasing  
387 flux through the de novo guanine nucleotide synthesis pathway in response to proliferative signalling. In  
388 the absence of either IMP or guanine ligands, IMPDH2 is conformationally dynamic (Fig. 6A). Apo  
389 IMPDH2 forms stable tetramers, which freely sample both the “bowed” and “flat” tetramer conformations,  
390 with the latter resulting in release of the N-terminus and assembly into stable interfacial octamers.  
391 Adenine nucleotides bind with high affinity to the Bateman domain, resulting in stable filaments in which  
392 the active site loops remain unconstrained and the enzyme is active. The ATP concentration required to  
393 induce filament assembly *in vitro* is far below the expected *in vivo* levels; we thus predict the apo state to  
394 be rare in human cells (Traut 1994). Without bound guanine nucleotides, the Bateman domains of  
395 individual protomers freely compress and extend (Fig. 6B). However, the flat tetramer conformation found  
396 in assembled IMPDH2 filaments is resistant to full compression of octameric filament segments. Binding  
397 of GTP to the Bateman domain stabilizes the compressed state, leading to lattice strain that is relieved  
398 by disassembly of the filament interface and tetramer bowing. In this way high intracellular guanine levels  
399 disassemble IMPDH2 filaments into stable free octamers whose activity is inhibited. Binding of IMP to  
400 the active site stabilizes the flexible active site loops, and saturation with both IMP and GTP results in  
401 compressed filaments in which the active sites of opposing tetramers interlock into a stable network. This  
402 rigidifies the octameric filament segment, which now resists the lattice strain brought on by compression,  
403 blocking GTP-induced filament disassembly.

404 By balancing these complex conformational dynamics, cells fine-tune feedback inhibition of the enzyme,  
405 consistent with the states in which IMPDH filaments are observed in cells (Fig. 6C). Under homeostatic  
406 conditions, the salvage pathways provide sufficient purine nucleotides, and IMP production is low. Under  
407 these conditions IMPDH2 is bound to both adenine and guanine nucleotides, but not IMP, forming free  
408 octamers rather than filaments. In vivo, filaments are typically not observed in quiescent cells; rather, as  
409 in our model, their assembly is associated with increased intracellular IMP and decreased intracellular  
410 GTP (Schiavon et al. 2018; Keppeke et al. 2018; Calise et al. 2014; Juda et al. 2014). Depletion of  
411 guanine allows Bateman domain extension, and transient assembly into enzymatically active filaments.  
412 However, upon restoration of guanine levels, these active filaments disassemble into compressed free  
413 octamers, mirroring the known feedback inhibition behavior of non-filament forming IMPDH homologues  
414 (Buey, Ledesma-Amaro, Velázquez-Campoy, et al. 2015; Buey et al. 2017; Fernández-Justel et al.  
415 2019).

416 The key difference is the substrate dependence of IMPDH2 filament assembly. IMP-saturated IMPDH2  
417 filaments resist both disassembly and the fully compressed, inhibited state. Even at elevated guanine  
418 nucleotide levels, these filaments retain a proportion of uninhibited active sites. This allows the cell to  
419 modulate enzyme activity to balance levels of product and substrate in response to metabolic demand,  
420 which can vary significantly depending on cell type and cell cycle stage. Our data strongly support the  
421 idea that IMPDH2 filament assembly serves to elevate intracellular guanine nucleotide levels during the  
422 proliferative state by resisting feedback inhibition. Production of IMP is upregulated in response to overall  
423 purine demand, as well as in response to proliferative signalling via the mechanistic target of rapamycin  
424 (mTOR) (Smith 1998; Ben-Sahra et al. 2016). Inhibition of mTOR reverses IMPDH filament assembly in  
425 activated mouse T-cells, as well as proliferating mouse liver cells (Duong-Ly et al. 2018; Chang et al.  
426 2015). Thus the dependence of filament assembly on IMP levels provides an avenue for regulation of  
427 assembly through established proliferative signalling pathways.

428 Many metabolic enzymes form filamentous polymers in cells in response to changes in metabolic state  
429 (Narayanaswamy et al. 2009; Ingerson-Mahar et al. 2010; Noree et al. 2010; O'Connell et al. 2012; Zhao  
430 et al. 2013; Petrovska et al. 2014; Shen et al. 2016; Saad et al. 2017). Most of these metabolic filaments  
431 are assembled from important regulatory enzymes, which suggests polymerization may play a role in  
432 modulating flux through these pathways. Recently, in just a few cases, structural and biochemical studies  
433 have provided insight into the functional consequences of enzyme filament assembly, suggesting that  
434 one role of polymers is to regulate activity by locking enzymes into active or inactive conformations  
435 through assembly contacts (Hunkeler et al. 2018; Barry et al. 2014; Lynch et al. 2017; Webb et al. 2018;  
436 Stoddard et al. 2019). Thus, it was surprising when our initial characterization of IMPDH2 filaments  
437 showed that assembly did not affect enzymatic activity or the ability to switch between active or inactive  
438 conformations (Anthony et al. 2017). Instead, as we have shown here, IMPDH2 filaments fine-tune the  
439 the allosteric response by reducing affinity for inhibitory downstream products. This represents a new

440 way in which enzyme assemblies can modulate flux through metabolic pathways, providing an additional  
441 layer of regulatory control on top of existing transcriptional, post-translational, and allosteric regulation.

442

#### 443 **Author Contributions**

444 Conceptualization, M.C.J. and J.M.K.; Methodology, M.C.J. and J.M.K.; Validation, M.C.J.; Formal  
445 Analysis, M.C.J.; Investigation, M.C.J.; Resources, J.M.K.; Data Curation, M.C.J.; Writing – Original Draft,  
446 M.C.J. and J.M.K.; Writing – Review & Editing, M.C.J. and J.M.K.; Visualization, M.C.J.; Supervision,  
447 J.M.K.; Project Administration, J.M.K.; Funding Acquisition, J.M.K.

448

#### 449 **Acknowledgements**

450 The authors thank the Arnold and Mabel Beckman Cryo-EM Center at the University of Washington for  
451 electron microscope use. We are grateful to J. Quispe for technical support and advice. We thank A.  
452 Burrell, G. Cai, A. Horowitz, K. Hvorecny, and E. Lynch for valuable feedback. This work was supported  
453 by the US National Institutes of Health (R01 GM118396 to J.M.K.).

454

#### 455 **Declaration of Interests**

456 The authors declare no competing interests.

457

458 **Main figures**

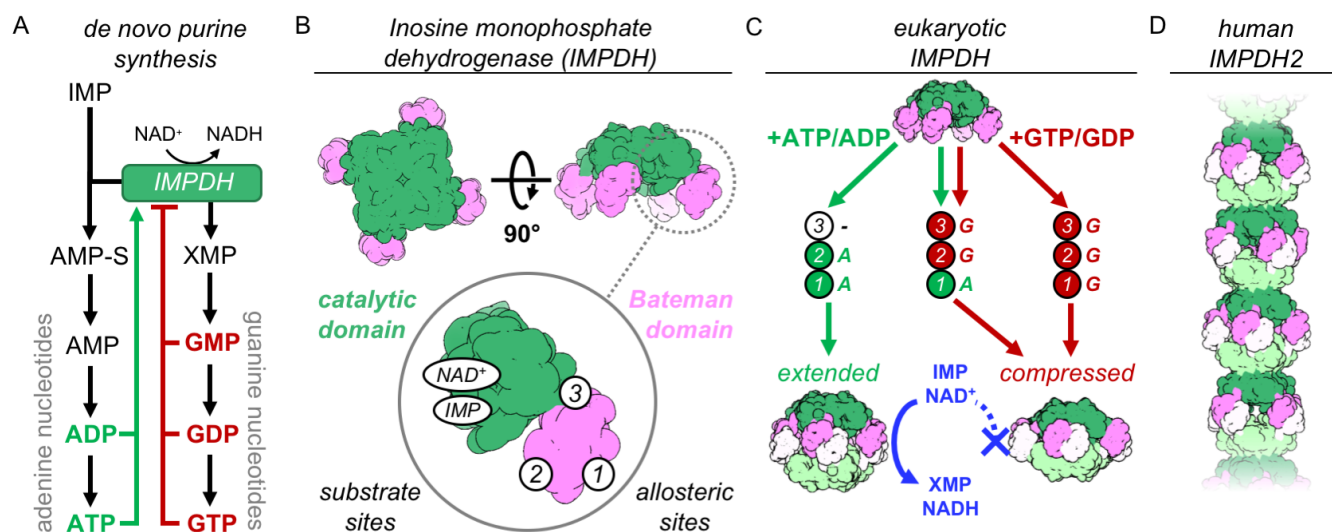

459

460 **Figure 1. IMPDH structure and function.** A) De novo purine nucleotide biosynthesis pathways. B)

461 IMPDH consists of a catalytic domain with two substrate binding sites (green), and a regulatory Bateman

462 domain with three allosteric binding sites on the Bateman domain numbered 1,2,3. C) Bound nucleotides

463 promote regulatory domain dimerization, forming reversible IMPDH octamers that may active or inhibited.

464 Opposing tetramers colored light green & light pink. D) Human IMPDH2 assembles into filaments

465 composed of canonical octamers.

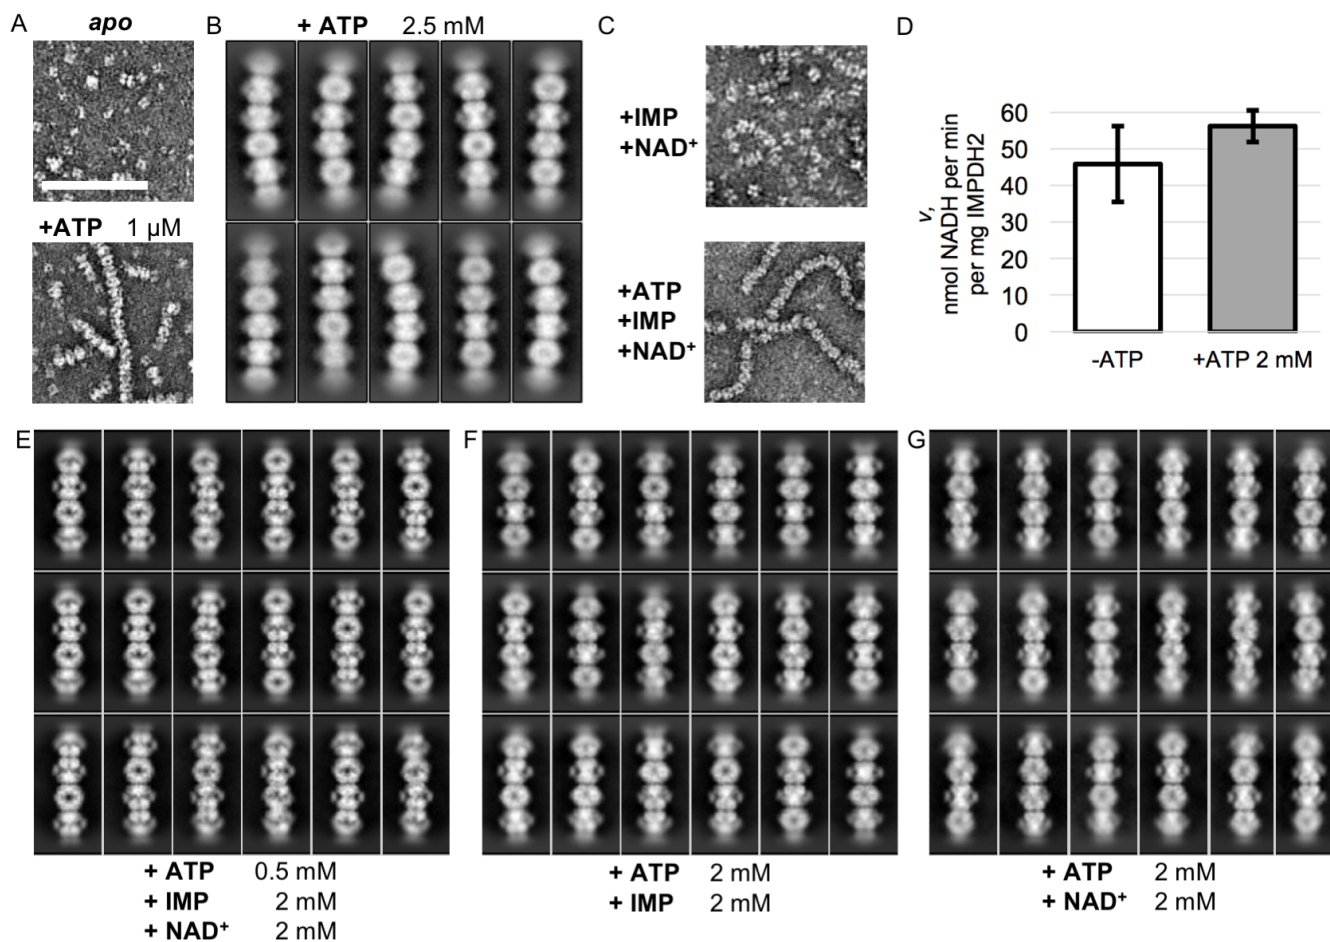

466

467 **Figure 2. Electron microscopy of uninhibited IMPDH2 filaments** A) Negative stain EM of purified  
 468 human IMPDH2. Treatment with 1  $\mu$ M ATP induces filament assembly. Scale bar 100 nm. B)  
 469 Representative 2D class averages from the +ATP cryo-EM dataset. C) Negative stain EM of actively  
 470 catalyzing IMPDH2 (both substrates present at 2 mM), with and without 2 mM ATP. D) Initial velocity of  
 471 enzyme with and without ATP (2 mM of both substrates). Average of three replicates, error bars +/- 1  
 472 S.D. E-G) Representative 2D class averages from the three uninhibited enzyme cryo-EM datasets.



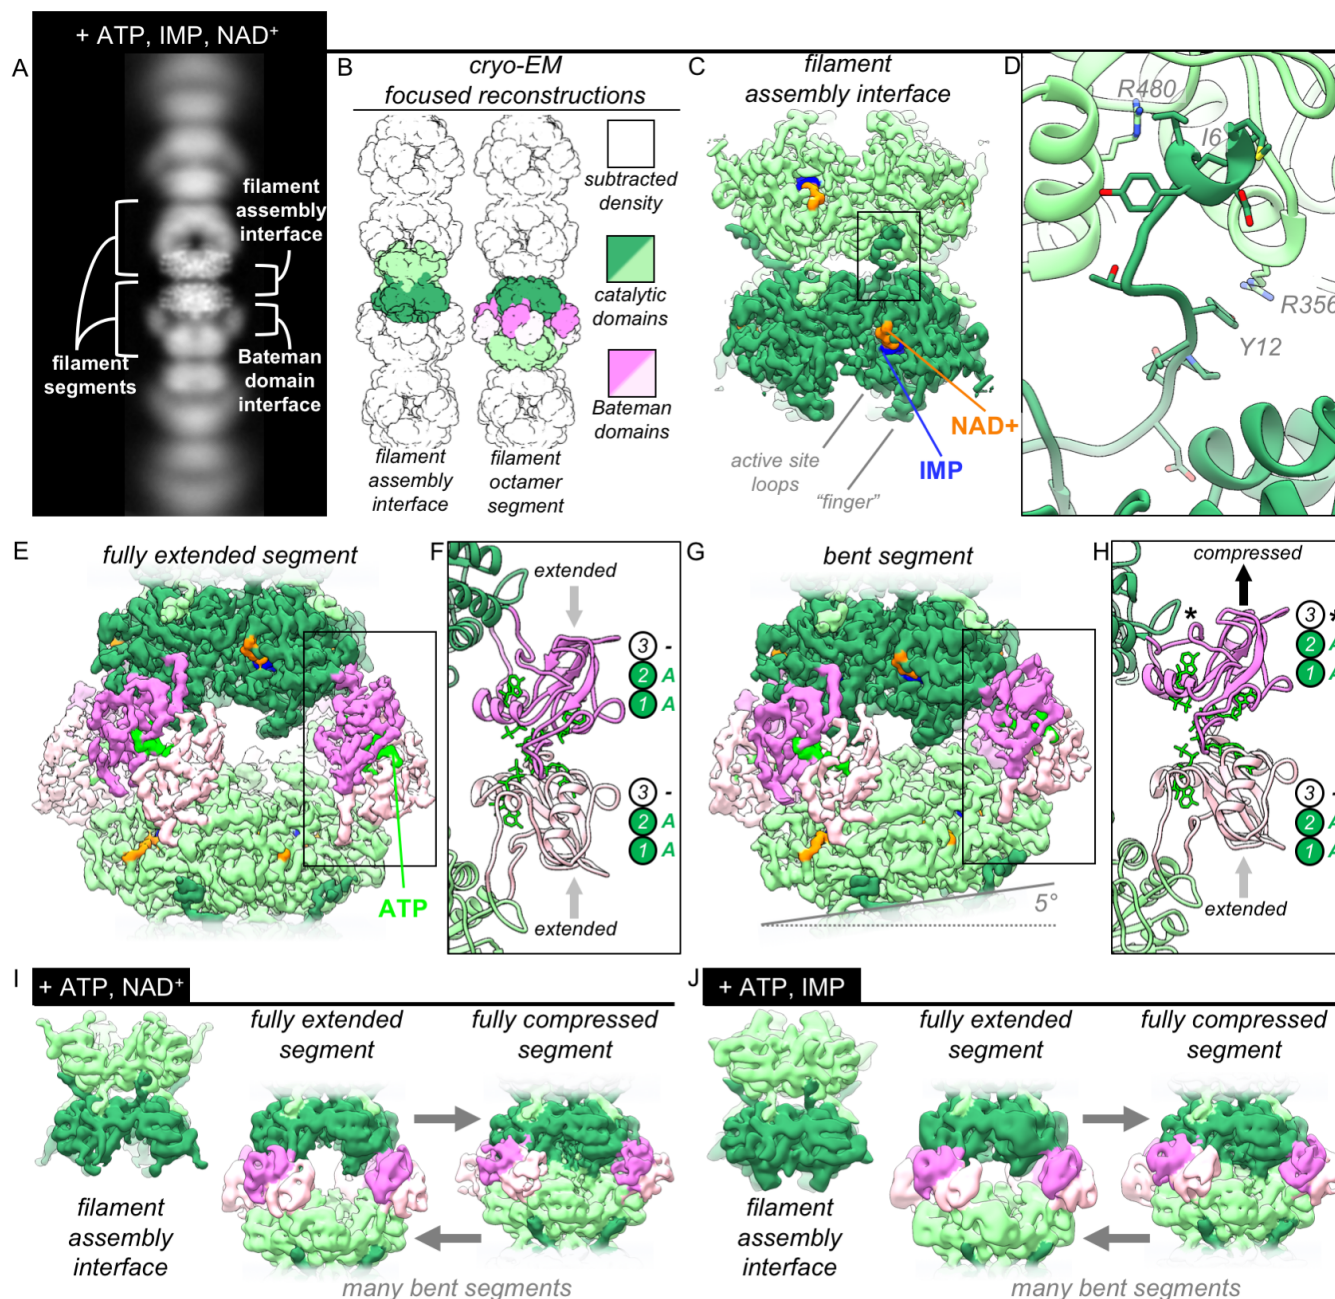

473

474

475

476

477

478

479

480

481

482

483

484

485

**Figure 3. The structures of uninhibited IMPDH2 filaments** A) Cryo-EM of IMPDH2 filaments with both substrates (representative 2D class average). B) We resolved two types of structures from IMPDH2 filaments: the consensus filament assembly interface, and various conformations of filament segments. C) Cryo-EM density for the ATP/IMP/NAD<sup>+</sup> consensus filament assembly interface, consisting of two tetramers bound back-to-back (dark and light green). D) The filament assembly interface is mediated by the vertebrate-specific N-terminus, in particular a key bridge between Y12 and R356. E) Cryo-EM density for the ATP/IMP/NAD<sup>+</sup> fully extended filament segment. Opposing catalytic tetramers (dark and light green), are held separate by their symmetrically extended Bateman domains (dark and light pink). ATP (bright green) is resolvable in the Bateman domains. F) In the fully extended Bateman domains, sites 1 and 2 are occupied by ATP, and site 3 is unformed. G) Cryo-EM density for the best resolved ATP/IMP/NAD<sup>+</sup> bent filament segment, in which the two catalytic tetramers are not parallel. H) Filament segment bending results from asymmetric compression of Bateman domains. In this reconstruction, one



486 protomer from each of the two tetramers is compressed, and allosteric site 3 is formed, but unoccupied  
 487 (black asterisk). I) Summary of the ATP/NAD<sup>+</sup> cryo-EM dataset. The filament assembly interface is  
 488 unchanged, and filament segments varied from fully extended, to bent, to fully compressed. In the  
 489 absence of IMP, the flexible active site loops are disordered. J) Summary of the ATP/IMP cryo-EM  
 490 dataset.

491

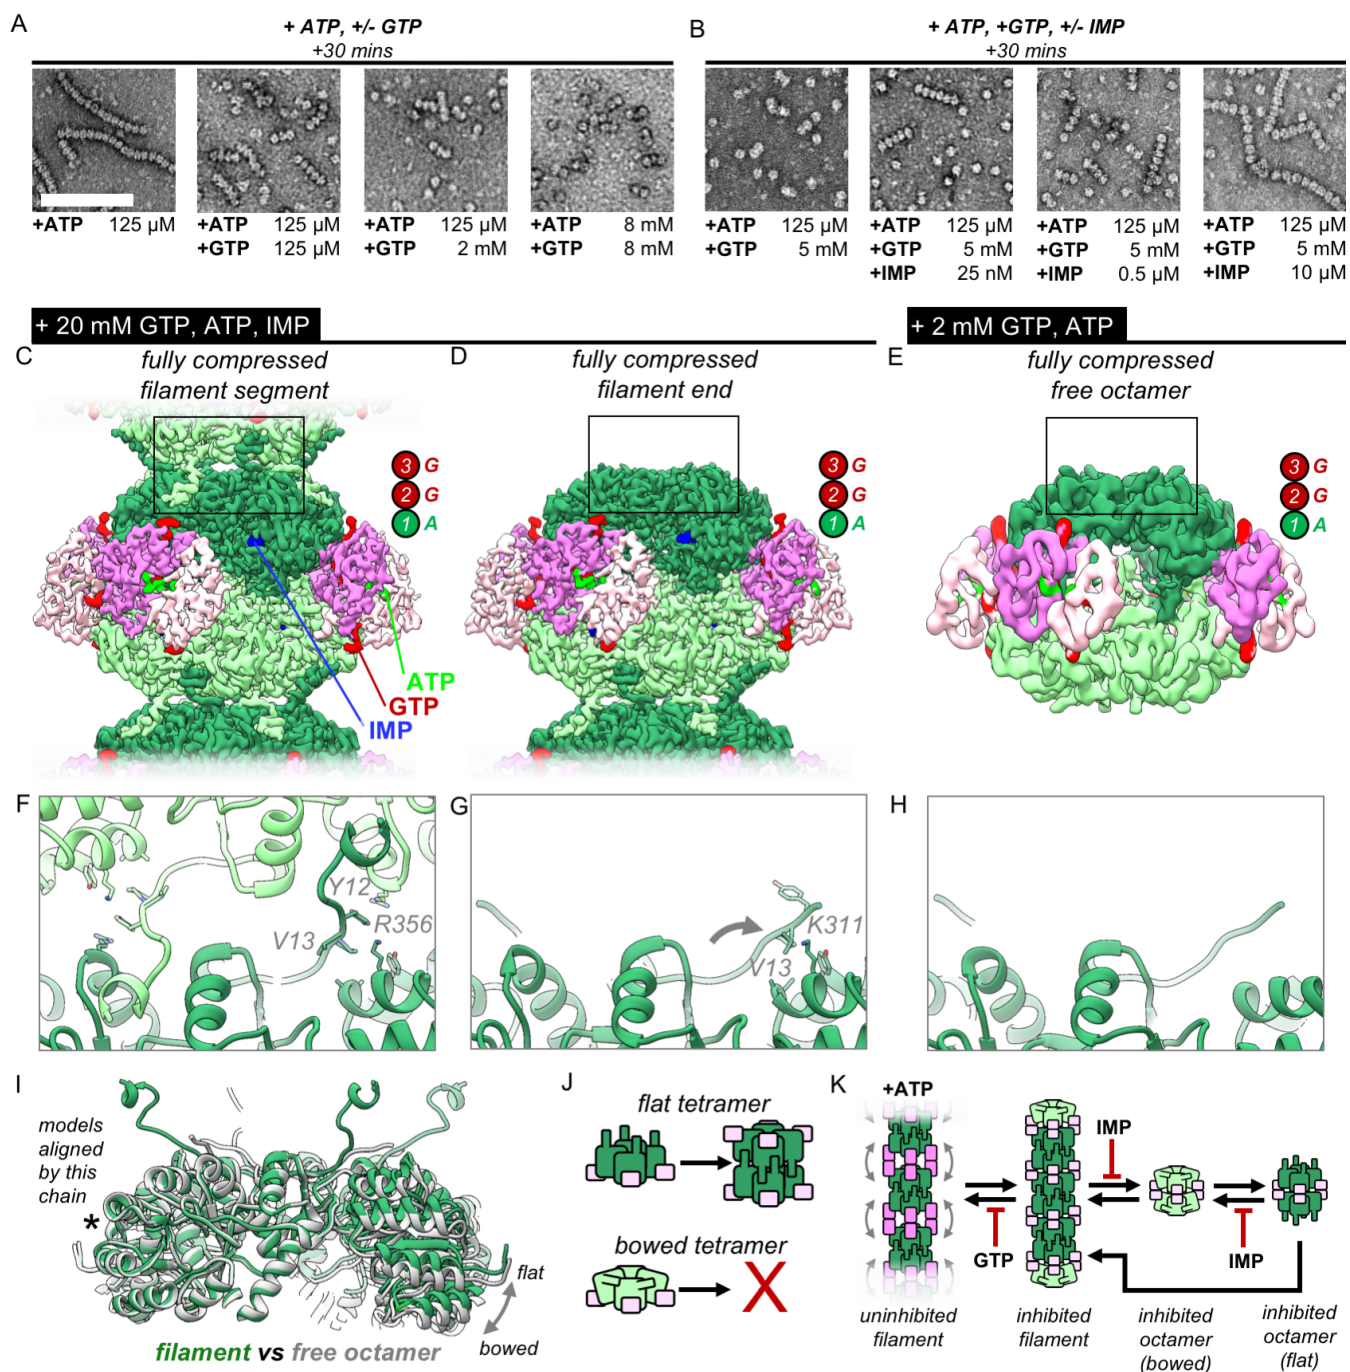

492

493 **Figure 4. IMP and GTP allosterically modulate filament assembly and disassembly.** A) Roughly 2  
 494 mM GTP inhibits filament assembly of IMPDH by ATP. Negative stain EM, protein concentration 2  $\mu$ M.  
 495 Scale bar 100 nm. B) Roughly 10  $\mu$ M IMP inhibits filament assembly by GTP. C) Composite cryo-EM

496 density of the GTP/ATP/IMP filament assembly interface and fully compressed filament segment maps.  
497 D) Cryo-EM density of the fully compressed filament end map. E) Cryo-EM density of the GTP/ATP non-  
498 filament fully compressed free octamer map. F-H) Close-up ribbon views of the assembled and  
499 unassembled filament interfaces the maps in A-C. I) Comparison between the tetramer conformations of  
500 the “flat” assembled filament interface (green) and the “bowed” unassembled free octamer (gray). J)  
501 Cartoon of the relationship between tetramer bowing and filament assembly. K) Model of the regulation  
502 of filament assembly by GTP and IMP.

503

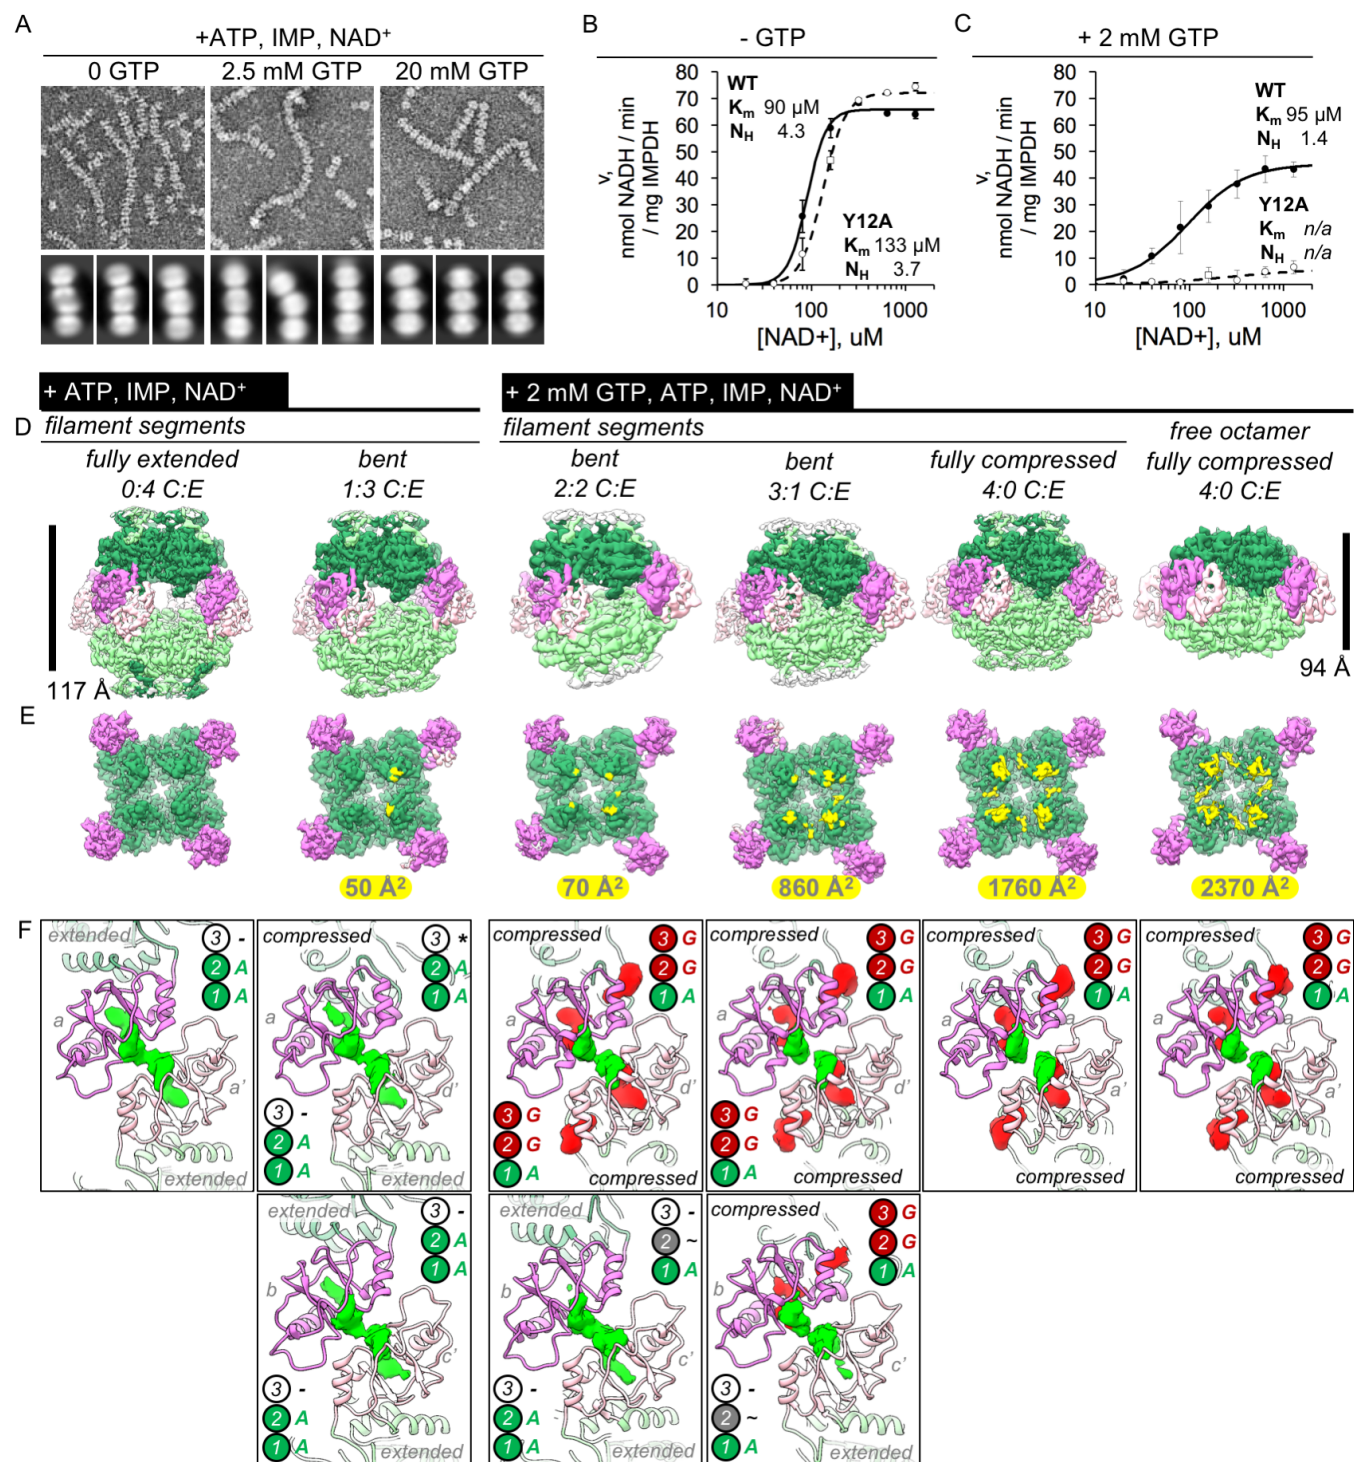

504

505

506

507

508

509

510

511

512

**Figure 5. IMPDH2 filaments resist GTP inhibition by promoting bent octamer conformations that separate opposing active sites.** A) Negatively stained EM of uninhibited (left), partially inhibited (center), and fully inhibited (right) IMPDH2. Representative micrographs and reference free 2D class averages. B) NAD<sup>+</sup> saturation curves of uninhibited WT IMPDH2 (solid line), and the non-assembly mutant Y12A (dashed line). Reactions performed with 0.5 mM ATP, 1 mM IMP. C) NAD<sup>+</sup> saturation curves of WT filaments treated with 2 mM GTP. D) Six cryo-EM maps from two datasets (uninhibited ATP/IMP/NAD<sup>+</sup> and partially inhibited ATP/IMP/NAD<sup>+</sup>/[2mM]GTP) exhibiting a range of Bateman domain conformations. E) A view of a single tetramer from the inside of each octamer. The lighter colored



513 tetramer from panel A is hidden, with the surface area buried between tetramer active sites colored in  
 514 yellow, with the indicated total buried surface area. F) Corresponding views of Bateman domain  
 515 conformations. Protein displayed as ribbon, with the two interacting Bateman domains colored orchid and  
 516 light pink. Cryo-EM density for non-protein ligand densities is colored green and red, for ATP and GTP,  
 517 respectively. Symmetry identities labelled with gray letters. In the extended conformation, allosteric site  
 518 3 is distorted, and does not bind ligands (black dashes). Allosteric site 3 is formed in compressed  
 519 protomers, but in the absence of guanine nucleotides it remains unoccupied (black asterisk). In the  
 520 extended protomers of some bent octamers, it is possible that allosteric site 2 is only partially occupied  
 521 (black tilde).

522

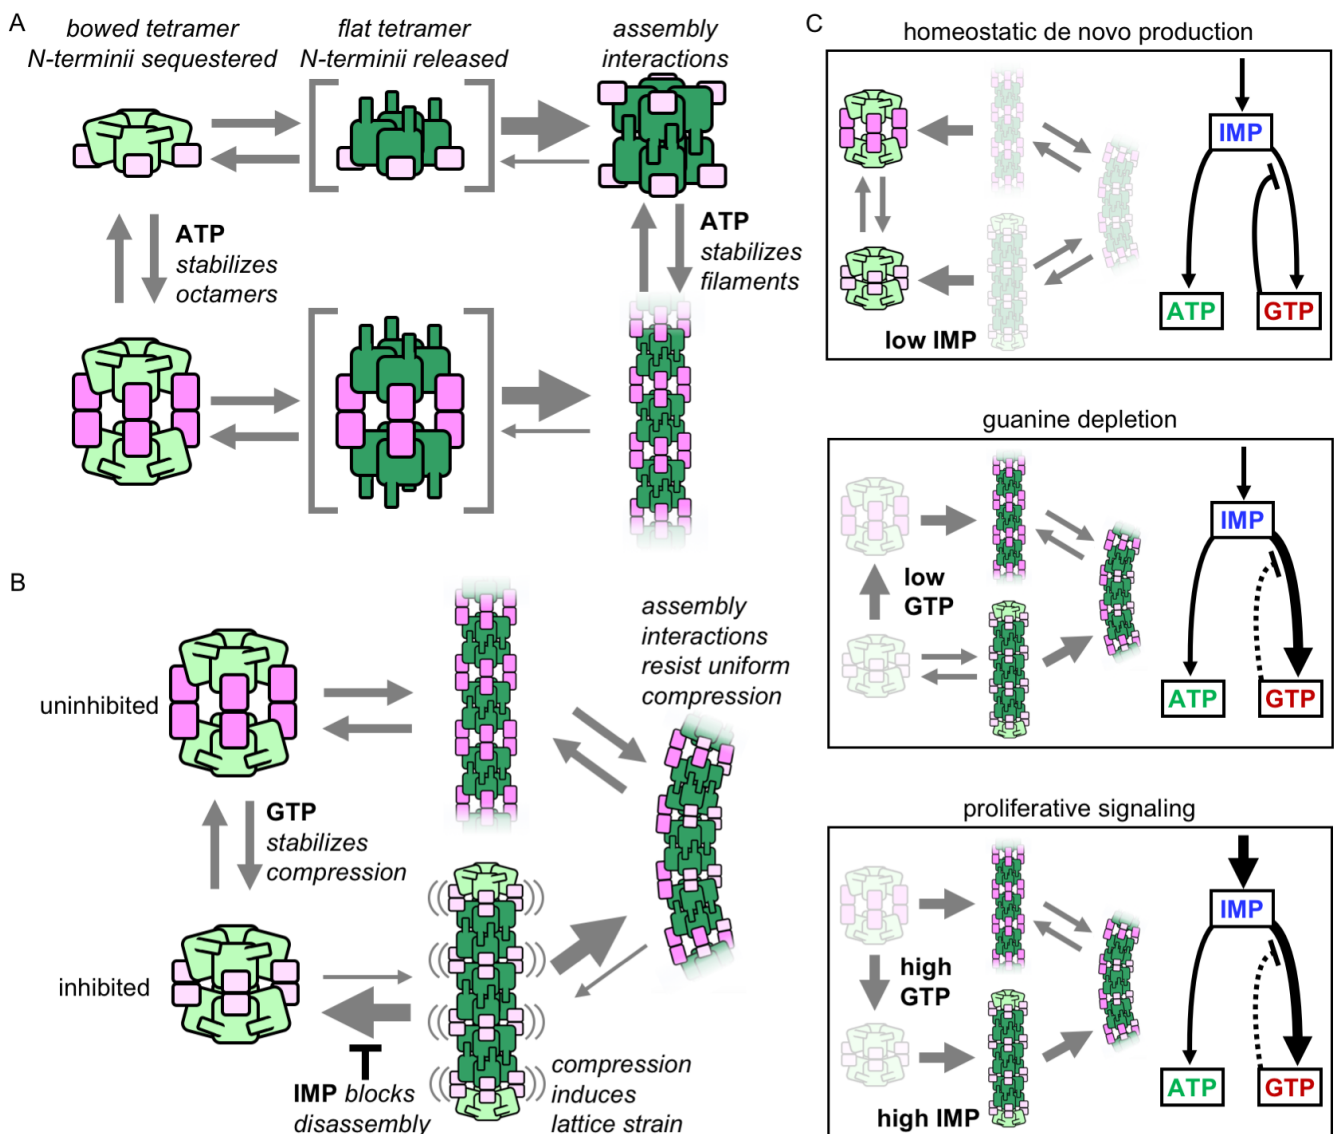

523

524 **Figure 6. Model of IMPDH2 assembly and filaments' role in guanine nucleotide regulation.** A)

525 Filament assemble when octamer interactions are stabilized by ATP binding to the regulatory domain

526 (pink), and the N-terminal residues (blue) are released by flattening of the catalytic tetramer (green).

527 Filament assembly interactions stabilize the flat conformation. B) GTP binding stabilizes an inhibited,

528 compressed conformation. Filament is less sensitive to GTP-induced compression, maintaining a  
529 population of octamers in mixed activity states. Filaments in the fully compressed GTP-bound state are  
530 strained, which promotes disassembly that is inhibited by substrate IMP binding. C) The equilibrium in  
531 (B) explains the different cellular conditions in which IMPDH polymerization occurs. i) Under homeostatic  
532 conditions IMPDH2 is dispersed and activity is regulated by GTP binding to octamers, which balances  
533 low levels of de novo synthesis between adenine and guanine pathways. ii) When guanine nucleotides  
534 are depleted the equilibrium shifts toward filaments. iii) Proliferative signaling can directly shift the  
535 equilibrium toward filaments, where higher flux is maintained through the guanine pathway under  
536 elevated GTP concentrations due to reduced sensitivity of the filaments to GTP inhibition (dashed line).

537

538

539

**Tables**

| Sample                           | IMPDH2 + ATP (0.5 mM), IMP (2 mM), NAD <sup>+</sup> (2 mM) |                             |                                 |                                 |
|----------------------------------|------------------------------------------------------------|-----------------------------|---------------------------------|---------------------------------|
| Data collection and processing   | # of micrographs                                           | 2169                        |                                 |                                 |
|                                  | Nominal magnification                                      | 130,000                     |                                 |                                 |
|                                  | Voltage (kV)                                               | 300                         |                                 |                                 |
|                                  | Electron fluence (e <sup>-</sup> /Å <sup>2</sup> )         | 100                         |                                 |                                 |
|                                  | Defocus range (μM)                                         | 0.9 – 3.2                   |                                 |                                 |
|                                  | Pixel size (Å)                                             | 1.05                        |                                 |                                 |
|                                  | Cryo-EM Reconstruction                                     | Filament assembly interface | Fully extended filament segment | Bent (1:3 C:E) filament segment |
|                                  | EMDB ID                                                    | EMD-20687                   | EMD-20688                       | EMD-20690                       |
|                                  | Number of particles                                        | 78471                       | 9124                            | 16819                           |
|                                  | Symmetry imposed                                           | D4                          | D4                              | D1                              |
|                                  | Map resolution (Å)                                         | 3.03                        | 3.29                            | 3.91                            |
|                                  | FSC threshold                                              | 0.143                       | 0.143                           | 0.143                           |
|                                  | Map Resolution range (Å)                                   | 2.8 – 3.6                   | 3.0 – 5.5                       | 3.6 – 10.5                      |
|                                  | Refinement                                                 | PDB ID                      | 6U8E                            | 6U8N                            |
| Map sharpening                   |                                                            | LocScale                    | LocScale                        | LocScale                        |
| Model composition                |                                                            |                             |                                 |                                 |
| Non-hydrogen atoms               |                                                            | 22984                       | 31528                           | 31528                           |
| Protein residues                 |                                                            | 3000                        | 4016                            | 4016                            |
| Ligands                          |                                                            | 16                          | 32                              | 32                              |
| Mean B factors (Å <sup>2</sup> ) |                                                            |                             |                                 |                                 |
| Protein                          |                                                            | 114.6                       | 137.4                           | 137.4                           |
| Ligand                           |                                                            | 123.1                       | 162.1                           | 173.3                           |
| R.m.s. deviations                |                                                            |                             |                                 |                                 |
| Bond lengths (Å)                 |                                                            | 0.0111                      | 0.0149                          | 0.0138                          |
| Bond angles (°)                  |                                                            | 1.27                        | 1.66                            | 1.63                            |
| Validation                       |                                                            |                             |                                 |                                 |
| MolProbity score                 |                                                            | 1.88                        | 2.67                            | 2.43                            |
| EMRinger score                   |                                                            | 3.91                        | 2.85                            | 2.14                            |
| Clashscore                       |                                                            | 5.63                        | 8.02                            | 10.16                           |
| Poor rotamers (%)                | 2.02                                                       | 9.05                        | 3.21                            |                                 |
| Ramachandran plot                |                                                            |                             |                                 |                                 |
| Outliers (%)                     | 0                                                          | 0.40                        | 0.28                            |                                 |
| Allowed (%)                      | 4.88                                                       | 8.27                        | 8.74                            |                                 |
| Favored (%)                      | 95.12                                                      | 91.33                       | 90.98                           |                                 |

540 **Table 1. Statistics of cryo-EM data collection, reconstruction and model refinement for the**  
 541 **ATP/IMP/NAD<sup>+</sup> dataset.**

542

| Sample                         | IMPDH2 + ATP (2 mM), NAD <sup>+</sup> (2 mM)       |                             |                                 |                                   |
|--------------------------------|----------------------------------------------------|-----------------------------|---------------------------------|-----------------------------------|
| Data collection and processing | # of micrographs                                   | 2289                        |                                 |                                   |
|                                | Nominal magnification                              | 130,000                     |                                 |                                   |
|                                | Voltage (kV)                                       | 300                         |                                 |                                   |
|                                | Electron fluence (e <sup>-</sup> /Å <sup>2</sup> ) | 100                         |                                 |                                   |
|                                | Defocus range (μM)                                 | 0.5 – 7.0                   |                                 |                                   |
|                                | Pixel size (Å)                                     | 1.062                       |                                 |                                   |
|                                | Cryo-EM Reconstruction                             | Filament assembly interface | Fully extended filament segment | Fully compressed filament segment |
| EMDB ID                        | EMD-20718                                          | EMD-20716                   | EMD-20709                       |                                   |
| Number of particles            | 57979                                              | 13266                       | 3394                            |                                   |
| Symmetry imposed               | D4                                                 | D4                          | D4                              |                                   |
| Map resolution (Å)             | 4.1                                                | 4.5                         | 4.5                             |                                   |
| FSC threshold                  | 0.143                                              | 0.143                       | 0.143                           |                                   |
| Map Resolution range (Å)       | 3.8 – 7.8                                          | 4.3 – 7.0                   | 4.2 – 7.3                       |                                   |

543 **Table 2. Statistics of cryo-EM data collection, reconstruction and model refinement for the**  
544 **ATP/NAD<sup>+</sup> dataset.**

545

| Sample                         | IMPDH2 + ATP (2 mM), IMP (3 mM)                    |                             |                                 |                                   |
|--------------------------------|----------------------------------------------------|-----------------------------|---------------------------------|-----------------------------------|
| Data collection and processing | # of micrographs                                   | 2178                        |                                 |                                   |
|                                | Nominal magnification                              | 105,000                     |                                 |                                   |
|                                | Voltage (kV)                                       | 300                         |                                 |                                   |
|                                | Electron fluence (e <sup>-</sup> /Å <sup>2</sup> ) | 100                         |                                 |                                   |
|                                | Defocus range (μM)                                 | 0.6 – 4.2                   |                                 |                                   |
|                                | Pixel size (Å)                                     | 1.366                       |                                 |                                   |
|                                | Cryo-EM Reconstruction                             | Filament assembly interface | Fully extended filament segment | Fully compressed filament segment |
| EMDB ID                        | EMD-20723                                          | EMD-20722                   | EMD-20720                       |                                   |
| Number of particles            | 92587                                              | 9549                        | 9648                            |                                   |
| Symmetry imposed               | D4                                                 | D4                          | D4                              |                                   |
| Map resolution (Å)             | 4.4                                                | 7.1                         | 4.9                             |                                   |
| FSC threshold                  | 0.143                                              | 0.143                       | 0.143                           |                                   |
| Map Resolution range (Å)       | 4.2 – 6.7                                          | 5.5 – 8.1                   | 4.2 – 10.5                      |                                   |

546 **Table 3. Statistics of cryo-EM data collection, reconstruction and model refinement for the**  
547 **ATP/IMP dataset.**

548



549

| Sample                           | IMPDH2 + ATP (2 mM), GTP (2 mM)                    |                        |
|----------------------------------|----------------------------------------------------|------------------------|
| Data collection and processing   | # of micrographs                                   | 1159                   |
|                                  | Nominal magnification                              | 130,000                |
|                                  | Voltage (kV)                                       | 300                    |
|                                  | Electron fluence (e <sup>-</sup> /Å <sup>2</sup> ) | 100                    |
|                                  | Defocus range (μM)                                 | 0.9 – 3.8              |
|                                  | Pixel size (Å)                                     | 1.05                   |
|                                  | Cryo-EM Reconstruction                             | Free canonical octamer |
|                                  | EMDB ID                                            | EMD-20725              |
|                                  | Number of particles                                | 26847                  |
|                                  | Symmetry imposed                                   | D4                     |
|                                  | Map resolution (Å)                                 | 4.5                    |
|                                  | FSC threshold                                      | 0.143                  |
|                                  | Map Resolution range (Å)                           | 4.1 – 5.7              |
|                                  | Refinement                                         | PDB ID                 |
| Map sharpening                   |                                                    | LocScale               |
| Model composition                |                                                    |                        |
| Non-hydrogen atoms               |                                                    | 28408                  |
| Protein residues                 |                                                    | 3624                   |
| Ligands                          |                                                    | 24                     |
| Mean B factors (Å <sup>2</sup> ) |                                                    |                        |
| Protein                          |                                                    | 243.6                  |
| Ligand                           |                                                    | 295.9                  |
| R.m.s. deviations                |                                                    |                        |
| Bond lengths (Å)                 |                                                    | 0.0149                 |
| Bond angles (°)                  |                                                    | 1.93                   |
| Validation                       |                                                    |                        |
| MolProbity score                 |                                                    | 2.96                   |
| EMRinger score                   |                                                    | -0.62                  |
| Clashscore                       |                                                    | 12.18                  |
| Poor rotamers (%)                | 14.82                                              |                        |
| Ramachandran plot                |                                                    |                        |
| Outliers (%)                     | 0                                                  |                        |
| Allowed (%)                      | 7.61                                               |                        |
| Favored (%)                      | 92.39                                              |                        |

550 **Table 4. Statistics of cryo-EM data collection, reconstruction and model refinement for the ATP,**  
 551 **2 mM GTP dataset.**

552

553

| Sample                           | IMPDH2 + ATP (0.5 mM), GTP (20 mM), IMP (1 mM)     |                             |                                   |                               |
|----------------------------------|----------------------------------------------------|-----------------------------|-----------------------------------|-------------------------------|
| Data collection and processing   | # of micrographs                                   | 2353                        |                                   |                               |
|                                  | Nominal magnification                              | 165,000                     |                                   |                               |
|                                  | Voltage (kV)                                       | 300                         |                                   |                               |
|                                  | Electron fluence (e <sup>-</sup> /Å <sup>2</sup> ) | 40                          |                                   |                               |
|                                  | Defocus range (μM)                                 | 0.3 – 2.8                   |                                   |                               |
|                                  | Pixel size (Å)                                     | 0.827                       |                                   |                               |
|                                  | Cryo-EM Reconstruction                             | Filament assembly interface | Fully compressed filament segment | Fully compressed filament end |
|                                  | EMDB ID                                            | EMD-20742                   | EMD-20741                         | EMD-20743                     |
|                                  | Number of particles                                | 31246                       | 8255                              | 18063                         |
|                                  | Symmetry imposed                                   | D4                          | D4                                | C4                            |
|                                  | Map resolution (Å)                                 | 2.9                         | 3.2                               | 3.3                           |
|                                  | FSC threshold                                      | 0.143                       | 0.143                             | 0.143                         |
|                                  | Map Resolution range (Å)                           | 2.7 – 3.5                   | 3.0 – 5.9                         | 3.0 – 6.0                     |
|                                  | Refinement                                         | PDB ID                      | 6UDP                              | 6UDO                          |
| Map sharpening                   |                                                    | LocScale                    | LocScale                          | LocScale                      |
| Model composition                |                                                    |                             |                                   |                               |
| Non-hydrogen atoms               |                                                    | 22728                       | 31392                             | 31008                         |
| Protein residues                 |                                                    | 3008                        | 4008                              | 3956                          |
| Ligands                          |                                                    | 8                           | 32                                | 32                            |
| Mean B factors (Å <sup>2</sup> ) |                                                    |                             |                                   |                               |
| Protein                          |                                                    | 68.5                        | 87.0                              | 71.1                          |
| Ligand                           |                                                    | 72.5                        | 118.8                             | 95.6                          |
| R.m.s. deviations                |                                                    |                             |                                   |                               |
| Bond lengths (Å)                 |                                                    | 0.0064                      | 0.0080                            | 0.0070                        |
| Bond angles (°)                  |                                                    | 1.21                        | 1.32                              | 1.27                          |
| Validation                       |                                                    |                             |                                   |                               |
| MolProbity score                 |                                                    | 1.27                        | 1.91                              | 1.70                          |
| EMRinger score                   |                                                    | 5.25                        | 3.34                              | 3.74                          |
| Clashscore                       |                                                    | 3.95                        | 4.93                              | 5.04                          |
| Poor rotamers (%)                |                                                    | 0.67                        | 2.21                              | 1.09                          |
| Ramachandran plot                |                                                    |                             |                                   |                               |
| Outliers (%)                     | 0                                                  | 0                           | 0                                 |                               |
| Allowed (%)                      | 2.43                                               | 5.86                        | 6.00                              |                               |
| Favored (%)                      | 97.57                                              | 94.14                       | 94.00                             |                               |

554 **Table 5. Statistics of cryo-EM data collection, reconstruction and model refinement for the**  
555 **ATP/IMP, 20 mM GTP dataset.**

556

| Sample                         | IMPDH2 + ATP (0.5 mM), GTP (2 mM), IMP (2 mM), NAD <sup>+</sup> (2 mM) |                             |                                 |                                 |                                   |                        |                          |
|--------------------------------|------------------------------------------------------------------------|-----------------------------|---------------------------------|---------------------------------|-----------------------------------|------------------------|--------------------------|
| Data collection and processing | # of micrographs                                                       | 2944                        |                                 |                                 |                                   |                        |                          |
|                                | Nominal magnification                                                  | 130,000                     |                                 |                                 |                                   |                        |                          |
|                                | Voltage (kV)                                                           | 300                         |                                 |                                 |                                   |                        |                          |
|                                | Electron fluence (e <sup>-</sup> /Å <sup>2</sup> )                     | 100                         |                                 |                                 |                                   |                        |                          |
|                                | Defocus range (μM)                                                     | 0.3 – 4.0                   |                                 |                                 |                                   |                        |                          |
|                                | Pixel size (Å)                                                         | 1.05                        |                                 |                                 |                                   |                        |                          |
|                                | Cryo-EM Reconstruction                                                 | Filament assembly interface | Bent (2:2 C:E) filament segment | Bent (3:1 C:E) filament segment | Fully compressed filament segment | Free canonical octamer | Free interfacial octamer |
|                                | EMDB ID                                                                | EMD-20691                   | EMD-20704                       | EMD-20705                       | EMD-20701                         | EMD-20707              | EMD-20706                |
|                                | Number of particles                                                    | 166384                      | 28918                           | 49897                           | 14067                             | 17785                  | 6770                     |
|                                | Symmetry imposed                                                       | D4                          | D1                              | D1                              | D4                                | D4                     | D4                       |
|                                | Map resolution (Å)                                                     | 3.1                         | 4.2                             | 3.7                             | 3.4                               | 3.8                    | 3.8                      |
|                                | FSC threshold                                                          | 0.143                       | 0.143                           | 0.143                           | 0.143                             | 0.143                  | 0.143                    |
|                                | Map Resolution range (Å)                                               | 3.0 – 3.8                   | 3.9 – 8.9                       | 3.3 – 8.7                       | 3.1 – 5.1                         | 3.6 – 5.4              | 3.4 – 6.8                |
| Refinement                     | PDB ID                                                                 | 6U8S                        | 6UA2                            | 6UA4                            | 6U9O                              | 6UAJ                   | 6UA5                     |
|                                | Map sharpening                                                         | LocScale                    | LocScale                        | LocScale                        | LocScale                          | LocScale               | LocScale                 |
|                                | Model composition                                                      |                             |                                 |                                 |                                   |                        |                          |
|                                | Non-hydrogen atoms                                                     | 23080                       | 31660                           | 31726                           | 31792                             | 31032                  | 23496                    |
|                                | Protein residues                                                       | 3008                        | 4016                            | 4016                            | 4016                              | 3952                   | 3008                     |
|                                | Ligands                                                                | 16                          | 36                              | 38                              | 40                                | 40                     | 16                       |
|                                | Mean B factors (Å <sup>2</sup> )                                       |                             |                                 |                                 |                                   |                        |                          |
|                                | Protein                                                                | 149.3                       | 218.6                           | 134.3                           | 142.6                             | 155.6                  | 98.1                     |
|                                | Ligand                                                                 | 166.9                       | 277.7                           | 173.3                           | 170.1                             | 184.2                  | 107.4                    |
|                                | R.m.s. deviations                                                      |                             |                                 |                                 |                                   |                        |                          |
|                                | Bond lengths (Å)                                                       | 0.0078                      | 0.0129                          | 0.0133                          | 0.0141                            | 0.0145                 | 0.0104                   |
|                                | Bond angles (°)                                                        | 1.38                        | 1.60                            | 1.45                            | 1.57                              | 1.75                   | 1.54                     |
|                                | Validation                                                             |                             |                                 |                                 |                                   |                        |                          |
|                                | MolProbity score                                                       | 2.59                        | 2.71                            | 2.18                            | 2.56                              | 2.97                   | 2.53                     |
|                                | EMRinger score                                                         | 2.61                        | 0.88                            | 2.42                            | 2.41                              | 1.64                   | 3.37                     |
|                                | Clashscore                                                             | 9.62                        | 14.17                           | 7.07                            | 7.29                              | 11.89                  | 9.01                     |
|                                | Poor rotamers (%)                                                      | 9.06                        | 4.10                            | 2.60                            | 8.31                              | 12.03                  | 8.52                     |
|                                | Ramachandran plot                                                      |                             |                                 |                                 |                                   |                        |                          |
|                                | Outliers (%)                                                           | 0                           | 0.05                            | 0.03                            | 0                                 | 0                      | 0                        |
|                                | Allowed (%)                                                            | 5.14                        | 11.27                           | 7.79                            | 7.26                              | 10.57                  | 4.86                     |
|                                | Favored (%)                                                            | 94.86                       | 88.68                           | 92.19                           | 92.74                             | 89.43                  | 95.14                    |

558 **Table 6. Statistics of cryo-EM data collection, reconstruction and model refinement for the**  
 559 **ATP/IMP/NAD<sup>+</sup>, 2 mM GTP dataset.**

561 **Supplemental Figures**

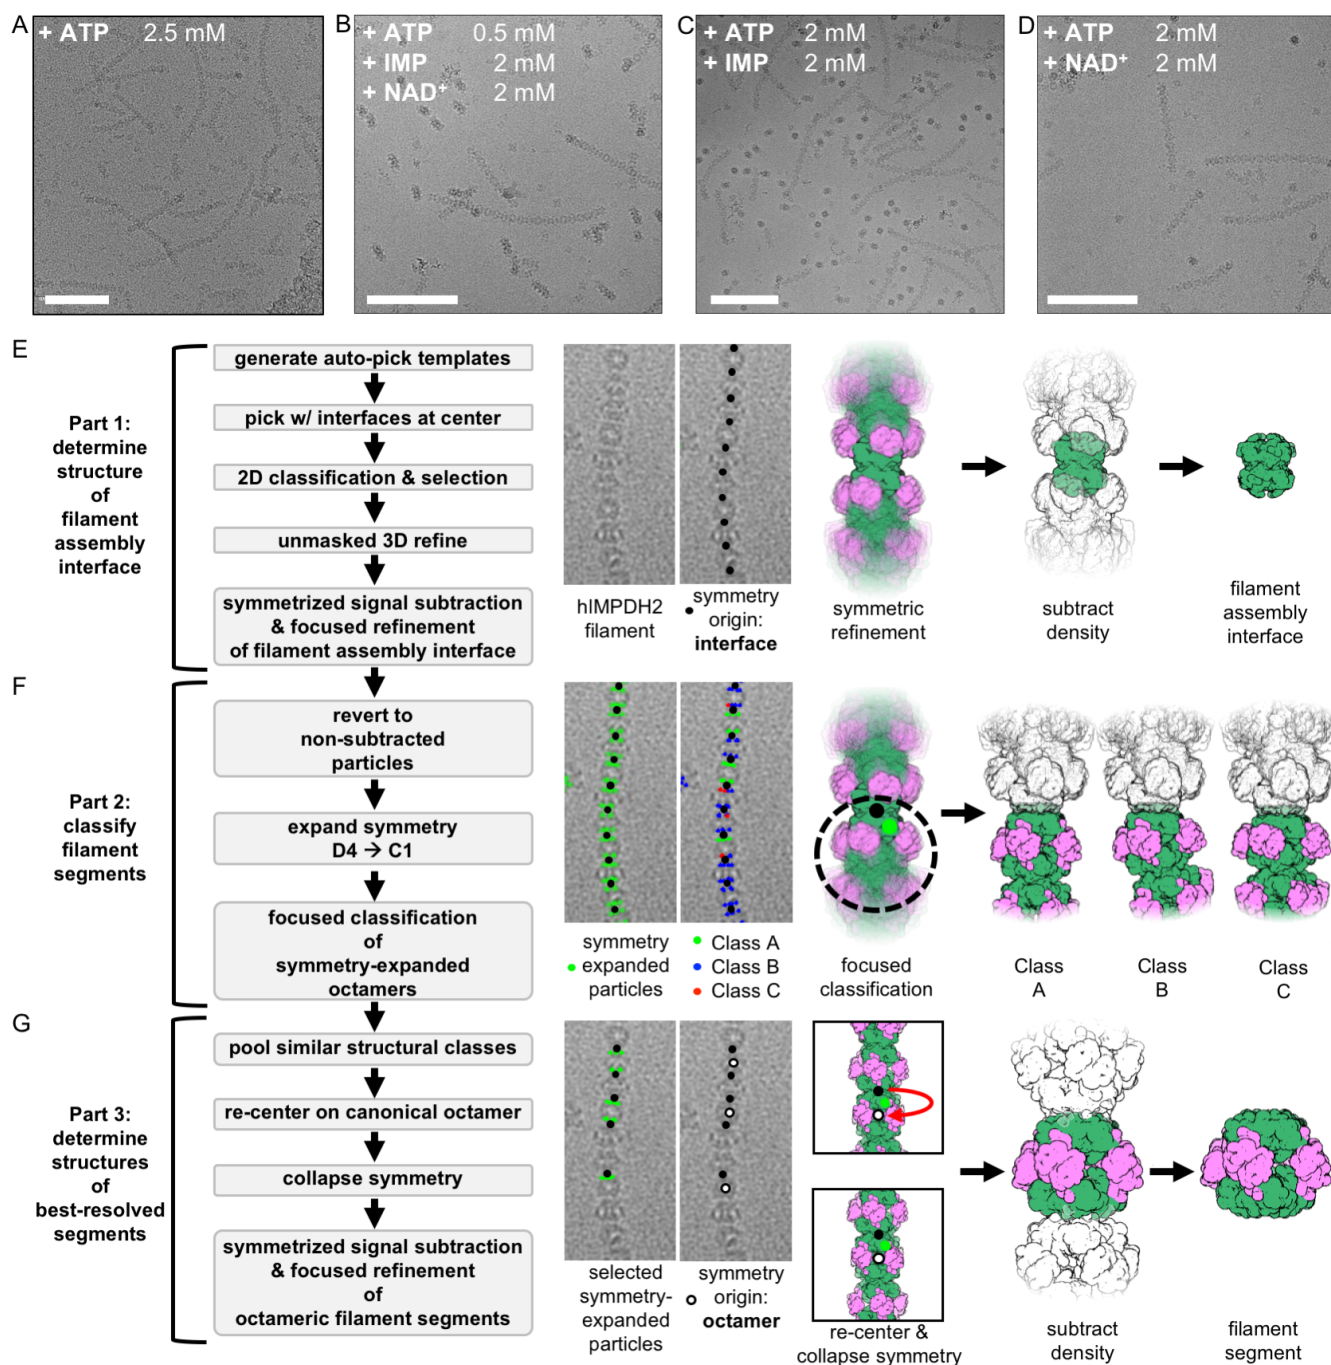

562

563 **Figure S1. A cryo-EM image processing workflow to for structure determination of flexible**

564 **IMPDH2 filaments** Related to Figure 2. A-D) Representative cryo-EM micrographs of IMPDH2 treated

565 with ATP (A), ATP and both substrates (B), ATP and IMP (C), or ATP and NAD<sup>+</sup> (D). Full datasets

566 contained 480, 2169, 2289, and 2178 micrographs, respectively. Scale bars 100 nm. E) Template-based

567 picking, unmasked refinement, density subtraction, and masked refinement results in a reconstruction of

568 the eight symmetrically arranged catalytic domains that make up the filament assembly interface. F)

569 Reverting to the un-subtracted particles, expanding the D4 symmetry, and classifying without alignment

570 using a mask including a single filament segment identifies different segment conformations. G) The best

571 resolved map of each filament segment class was obtained by pooling similar classes, re-extracting and  
572 re-centering the refinement from the assembly interface onto to the canonical octamer, collapsing the  
573 symmetry expansion by deleting all Euler angle priors and removing overlapping particles, and re-refining  
574 from scratch, with additional classification and application of point-group symmetry resulting in further  
575 improvements in resolution.

576



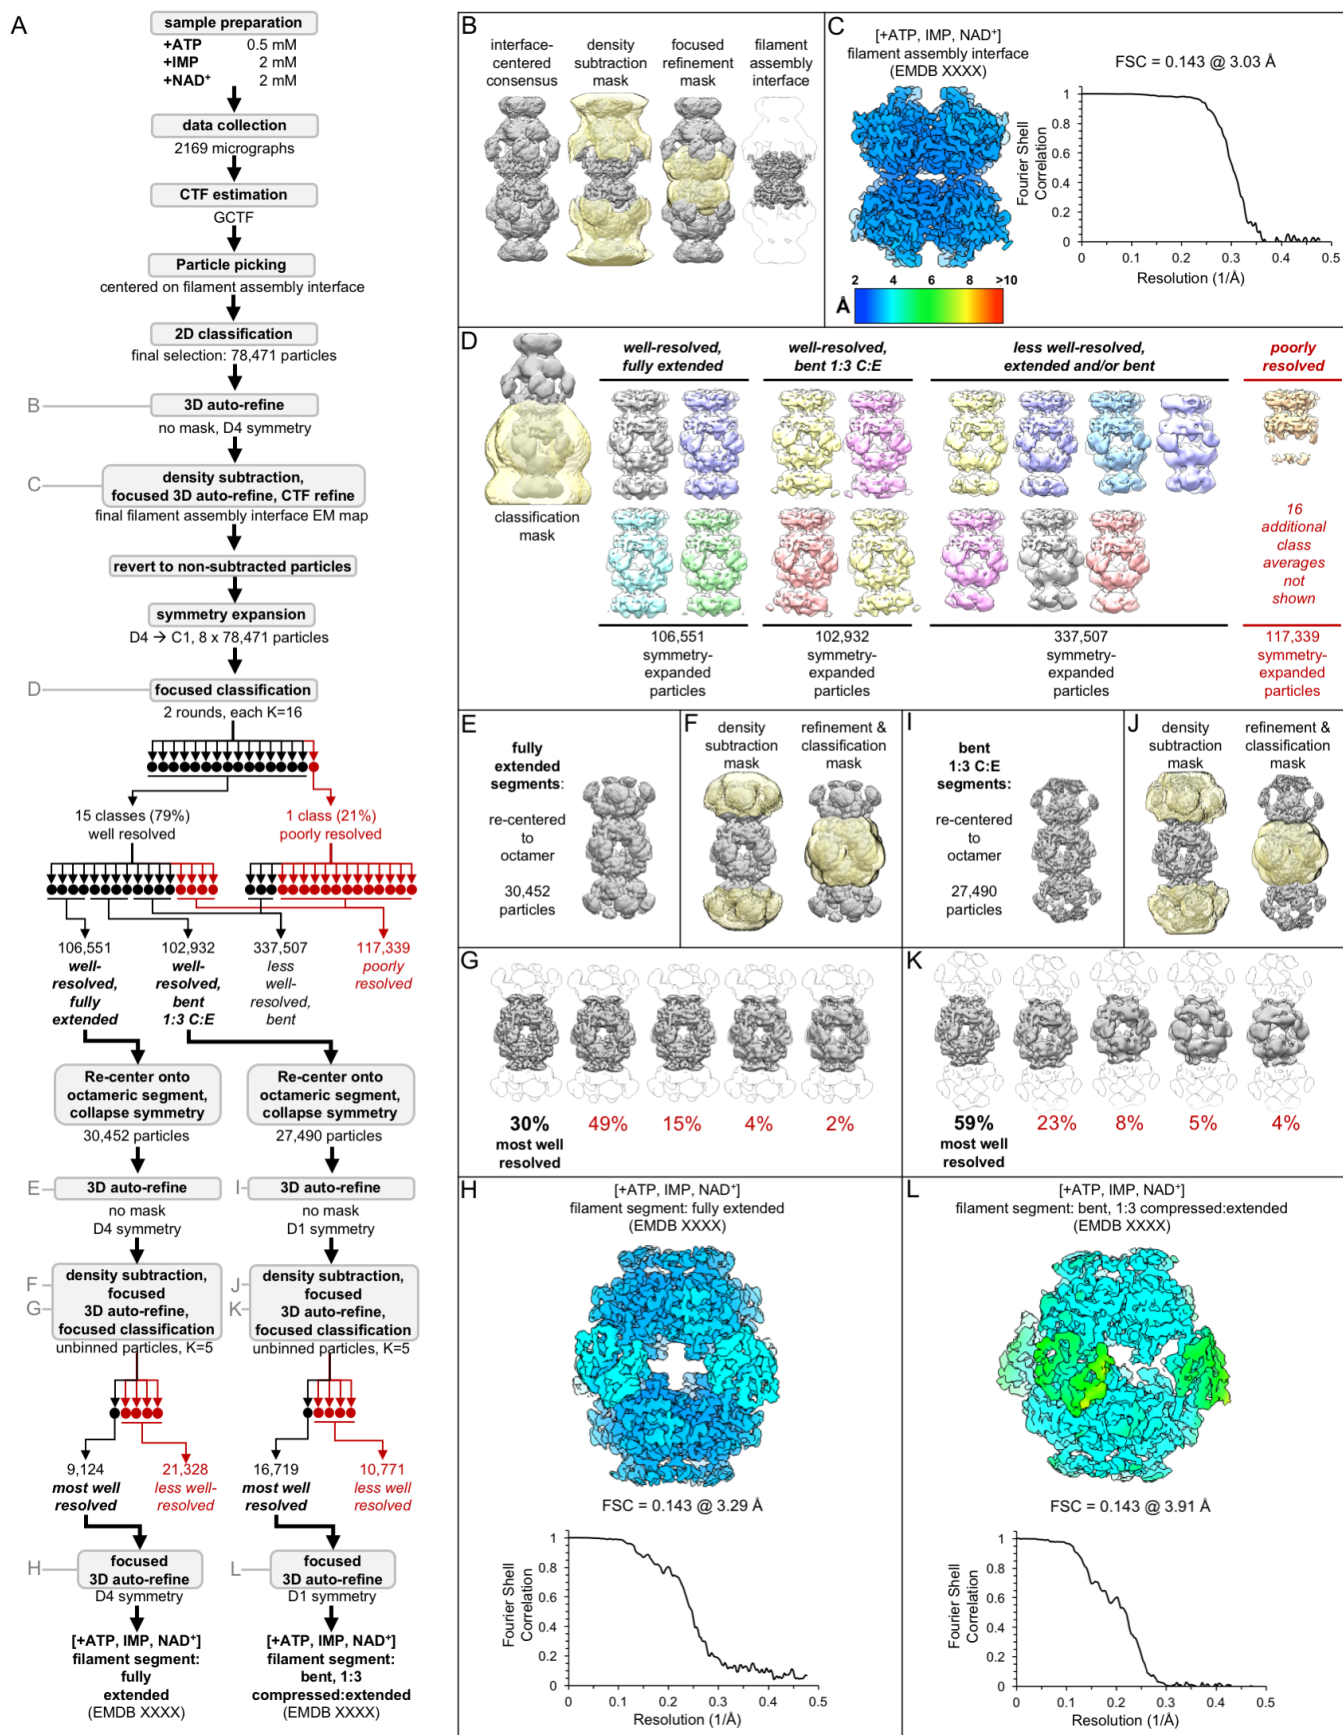

577

578 **Figure S2. Image processing of the IMPDH2 +ATP, IMP, NAD<sup>+</sup> cryo-EM dataset. Related to Table 1.**

579 A) Flow chart summarizing data processing strategy. B) Density subtraction and focused refinement of

580 the consensus filament assembly interface. C) Local resolution estimation and FSC curve (via relion

581 postprocessing) for the ATP/IMP/NAD+ consensus filament assembly interface. D) Final class averages  
582 from symmetry expanded classification of filament segments. E) Unmasked refinement from all fully  
583 extended segments, pooled and re-centered. F) Masks used for continued processing of fully extended  
584 segments. G) Final classification of the best-resolved fully extended filament segment class H) Local  
585 resolution estimation and FSC curve for the ATP/IMP/NAD+ fully extended filament segment I-L) Same  
586 as E-H, but for the best-resolved ATP/IMP/NAD+ bent filament segment

587



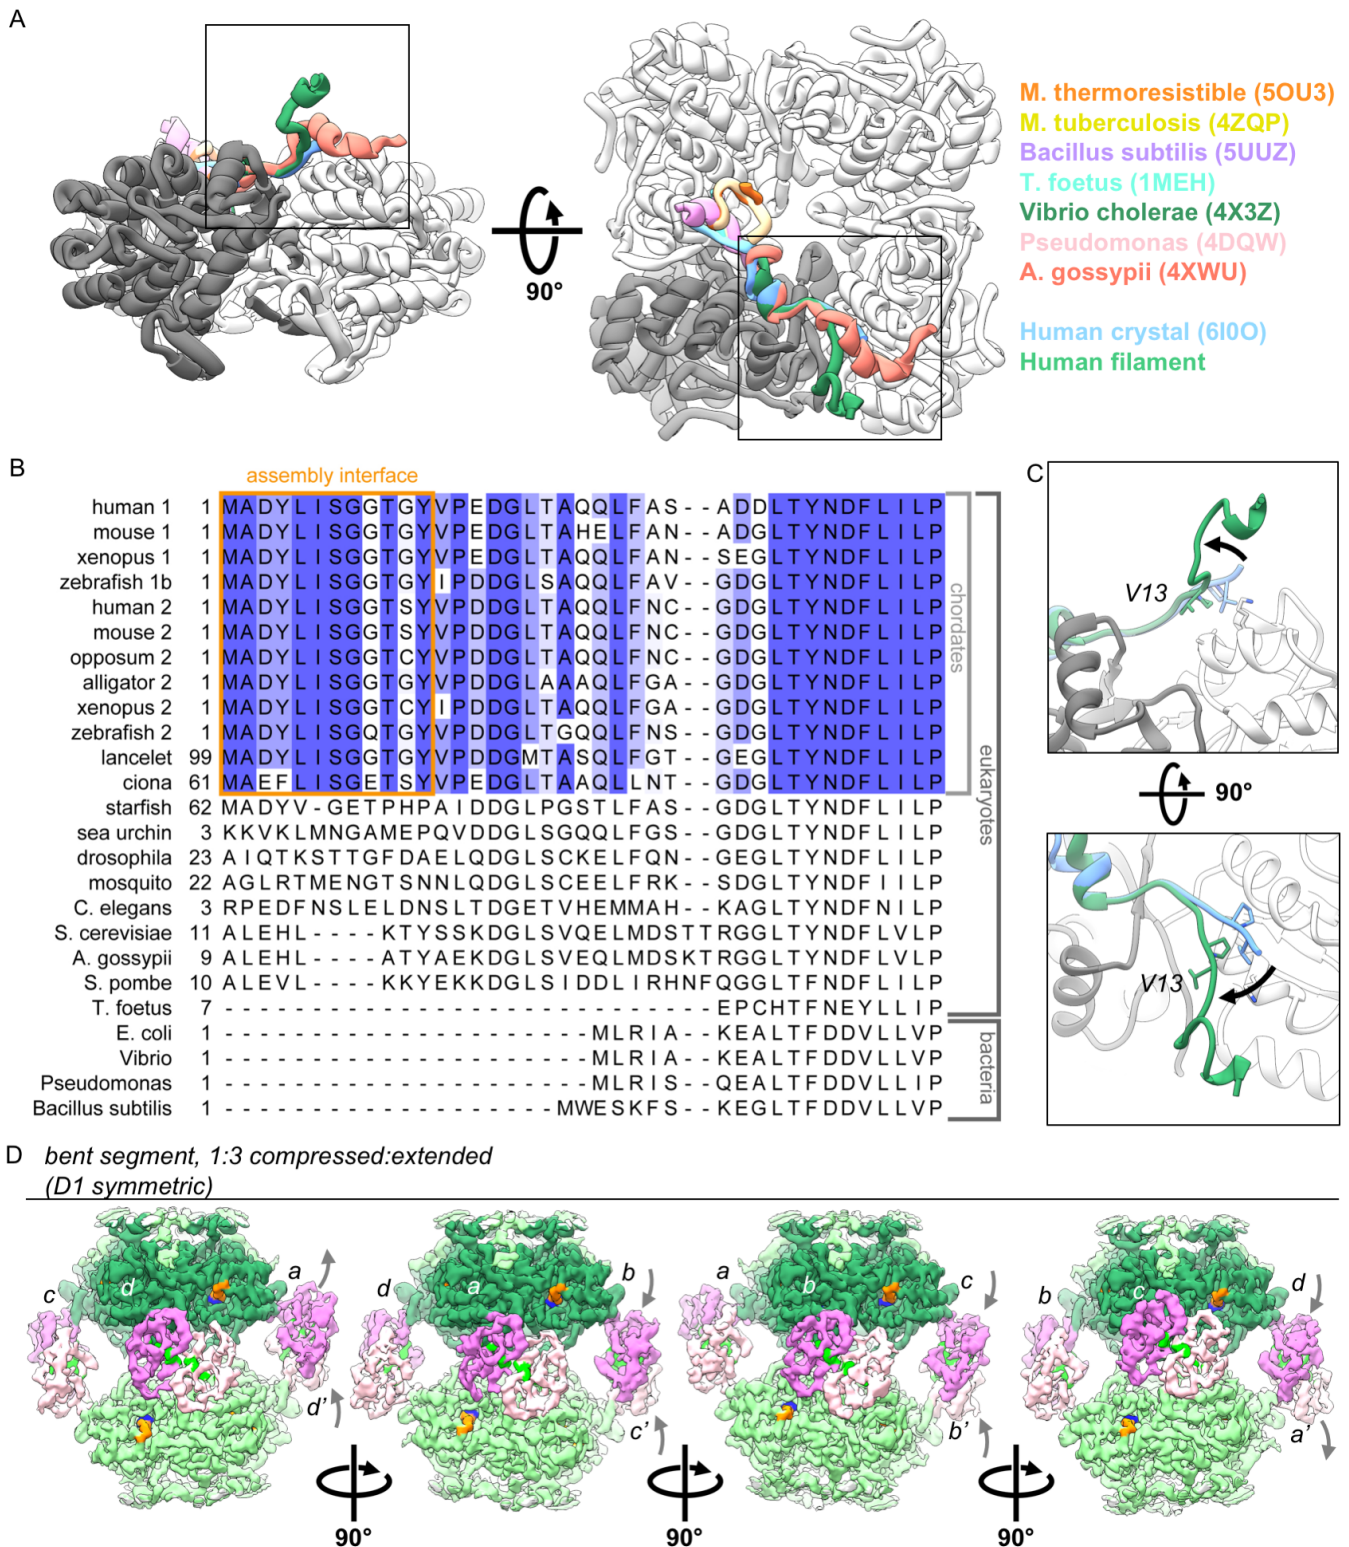

588

589 **Figure S3. The vertebrate-specific N-terminus mediates IMPDH2 assembly of ATP-bound IMPDH2**

590 **filaments, in which individual protomers can extend or compress freely.** Related to Figure 3. A) The

591 conformation of the N-terminus seen in assembled filaments of human IMPDH2 is unique among solved

592 IMPDH structures, including other human structures. Boxed regions correspond to views in panel C. B)

593 Sequence alignment of human IMPDH1 (human 1) and IMPDH2 (human 2) and other IMPDH

594 homologues. C) Comparison of N-terminus conformations from cryo-EM of assembled filament (green)

595 and published crystallized IMPDH2 (blue, PDB ID 6I0O). F) Rotated views of the cryo-EM density for the

596 best resolved ATP/IMP/NAD<sup>+</sup> bent structure, colored as in Fig 2. The asymmetric unit is a tetramer, and  
 597 each of the four chains can be viewed by rotating incrementally by 90 degrees. Gray letters and arrows  
 598 indicate chain symmetry mates and Bateman domain conformations.

599

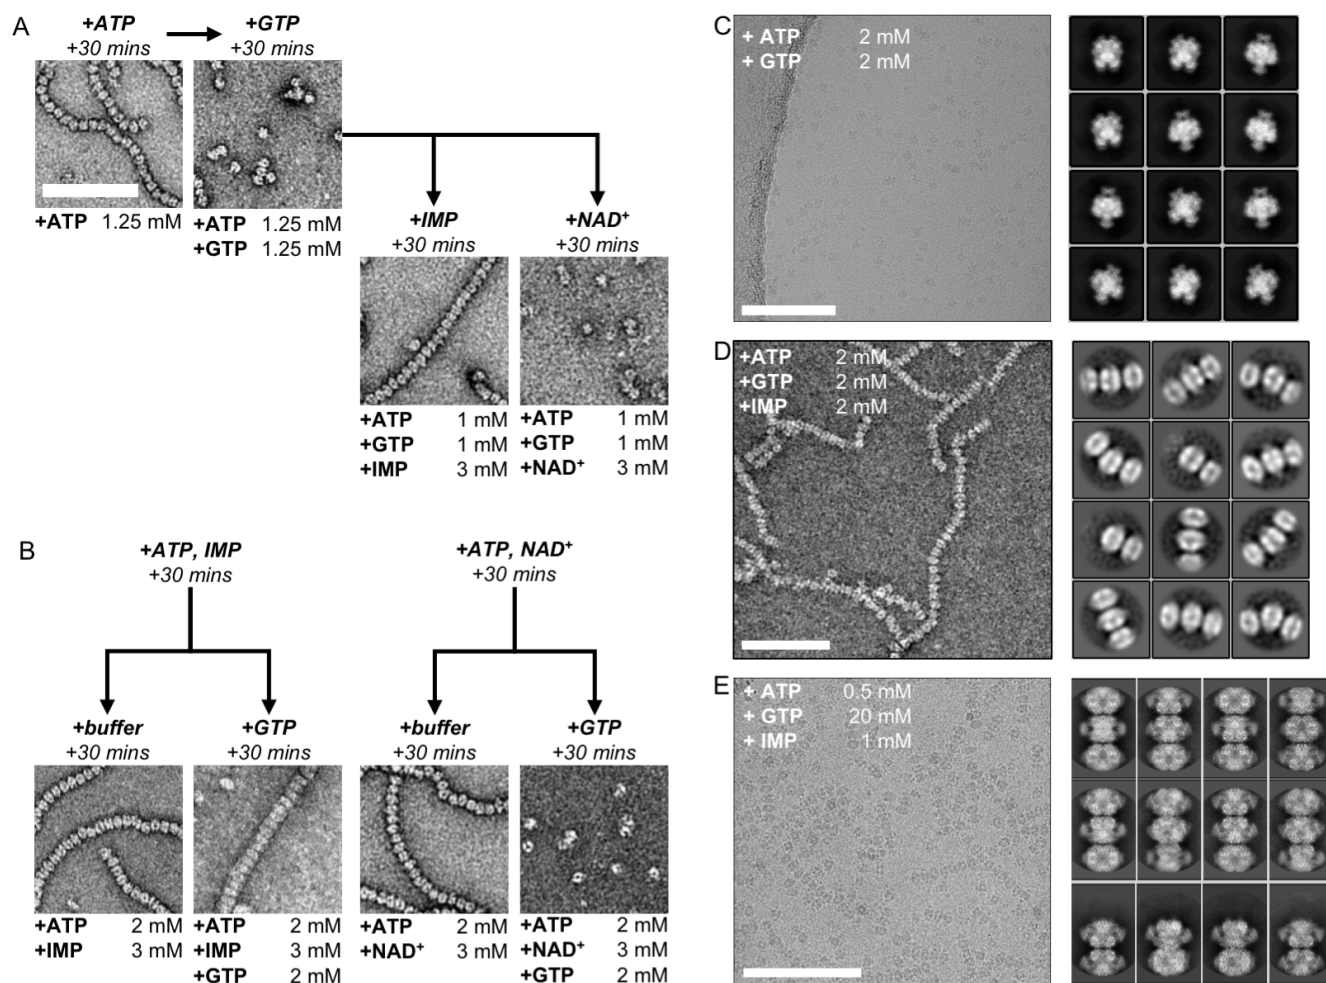

600

601 **Figure S4. Electron microscopy of human IMPDH2 treated with ATP, GTP, IMP, and NAD<sup>+</sup>** Related  
 602 to Figure 4. A) IMP, but not NAD<sup>+</sup>, promotes re-assembly of GTP-disassembled filaments. Reagents  
 603 added sequentially, with 30 minut room-temperature incubation steps between. B) IMP, but not NAD<sup>+</sup>,  
 604 protects against disassembly of filaments by GTP. Reagents added sequentially, with 30 minut  
 605 room-temperature incubation steps between. C) Cryo-EM of IMPDH2 treated with ATP and 2 mM GTP.  
 606 Representative micrograph (of 1159) and 2D class averages. D) Negative stain EM f IMPDH2 treated  
 607 with ATP, IMP, and 2 mM GTP. Representative micrograph and 2D class averages. E) Cryo-EM of  
 608 IMPDH2 treated with ATP and 2 mM GTP. Representative micrograph (of 2248), and 2D class  
 609 averages. All scale bars 100 nm.

610



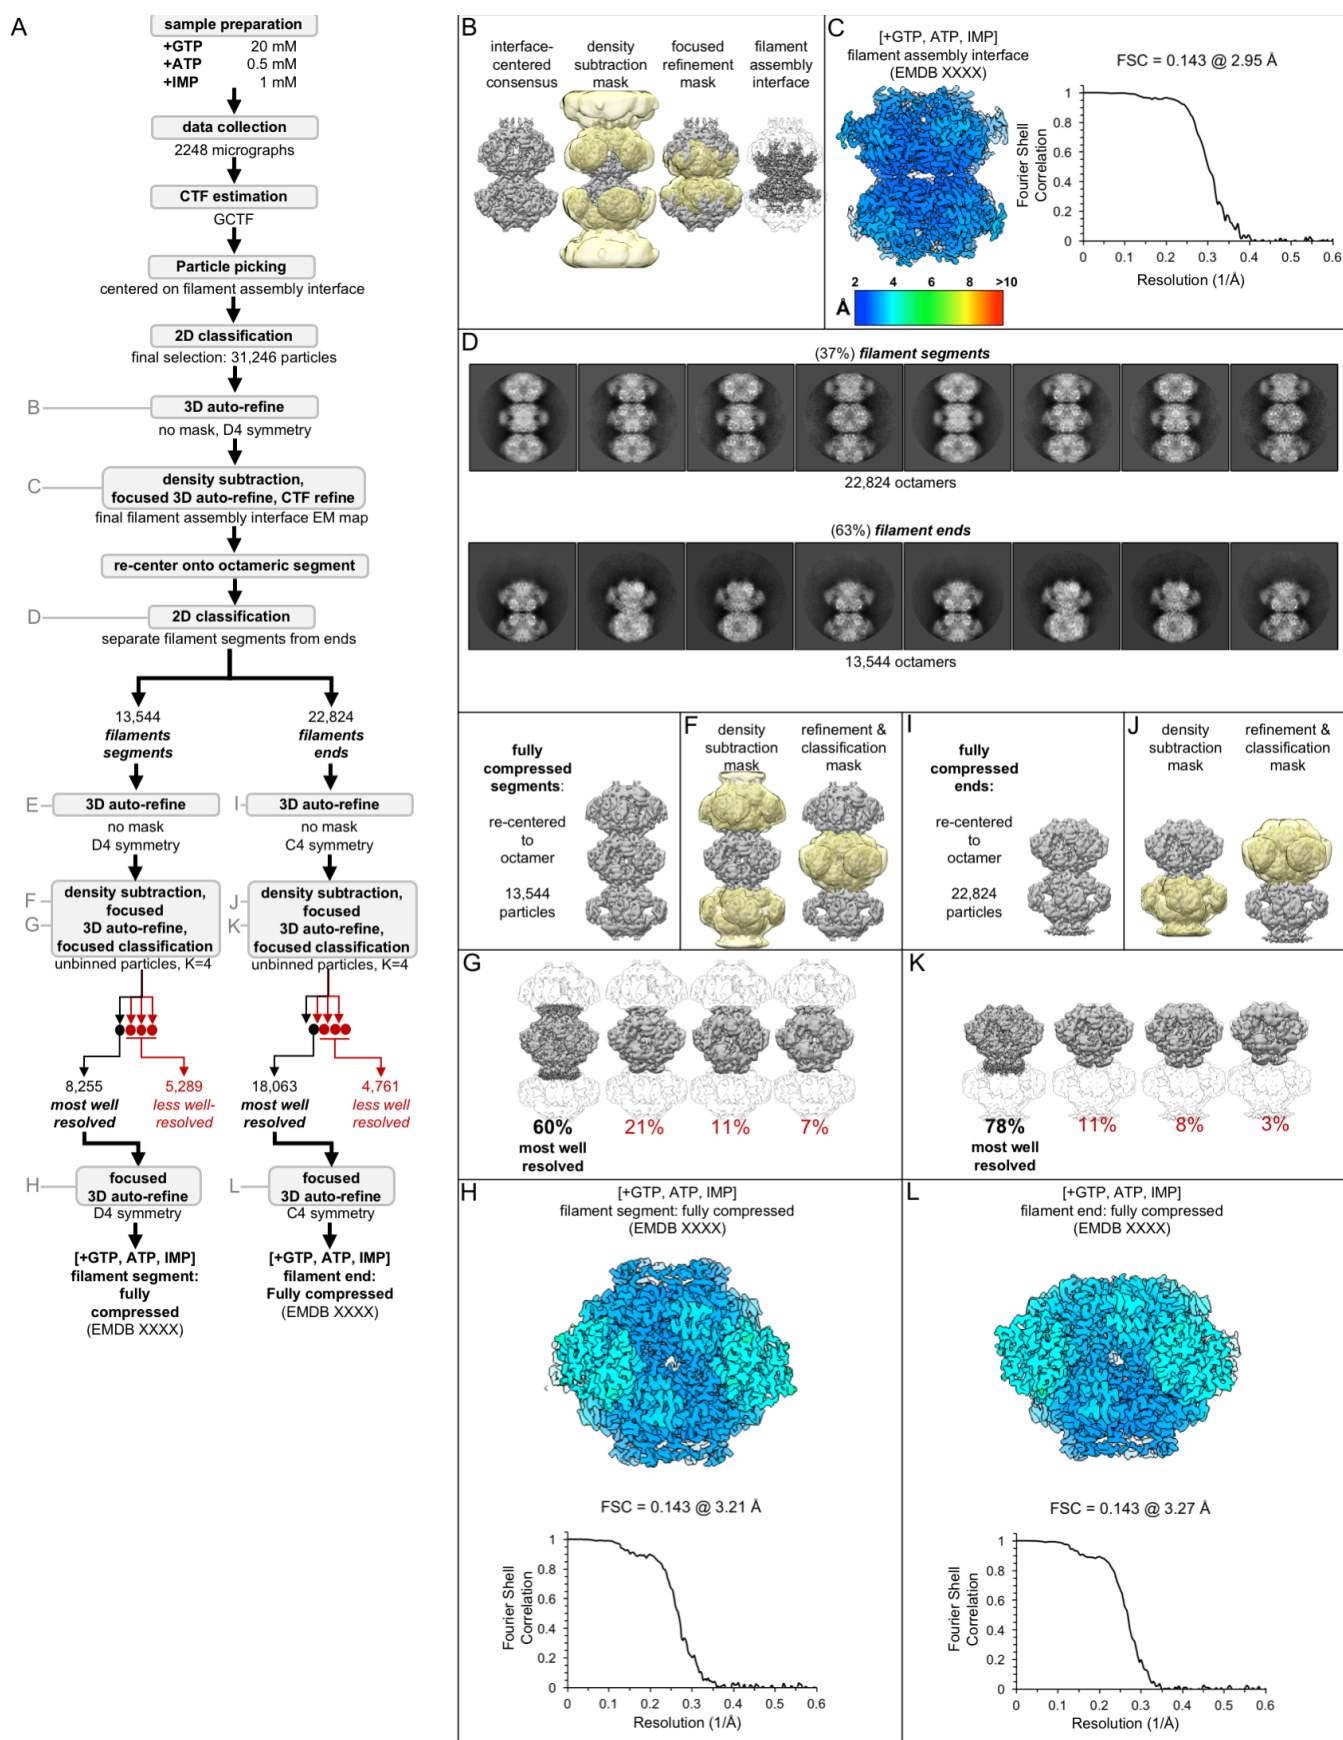

611

612 **Figure S5 Image processing of the IMPDH2 +ATP, IMP, 20 mM GTP cryo-EM dataset.** Related to

613 Table 5. A) Flow chart summarizing data processing strategy. B) Density subtraction and focused

614 refinement of the consensus filament assembly interface. C) Local resolution estimation and FSC curve



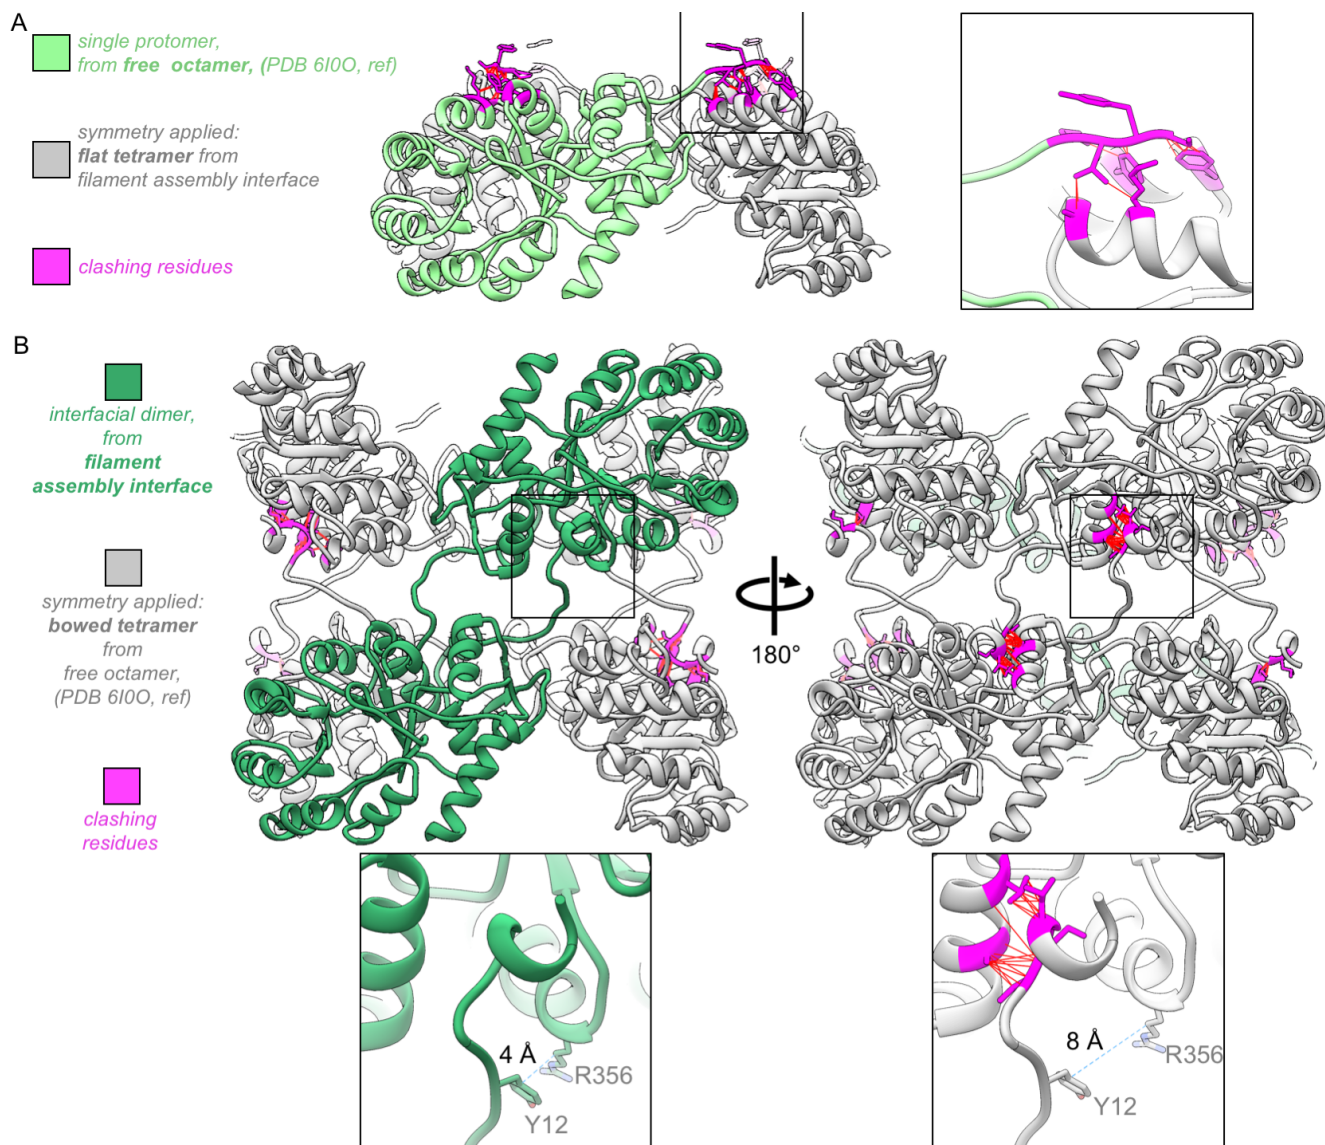

632

633 **Figure S7. The assembled IMPDH2 filament interface is not compatible with the “bowed” tetramer**

634 **conformation seen in the unassembled GTP-bound free octamer.** Related to Figure 4. A) The

635 protomer from the +GTP crystal structure 6I0O (green), with applied symmetry from the filament

636 assembly interface “flat” tetramer (gray). N-terminus residues that now clash are colored magenta. Inset:

637 closeup of clashing N-terminus. Red lines indicate specific steric clashes. B) Two identical protomers of

638 the filament assembly interface dimer (green) with applied symmetry from the “bowed” tetramer of the

639 +GTP crystal structure 6I0O (gray), with clashing residues colored magenta. Inset: tetramer bowing

640 separates the key residues Y12 and R356 (distances shown are between the gamma carbons of the two

641 residues, indicated by dotted blue line).

642



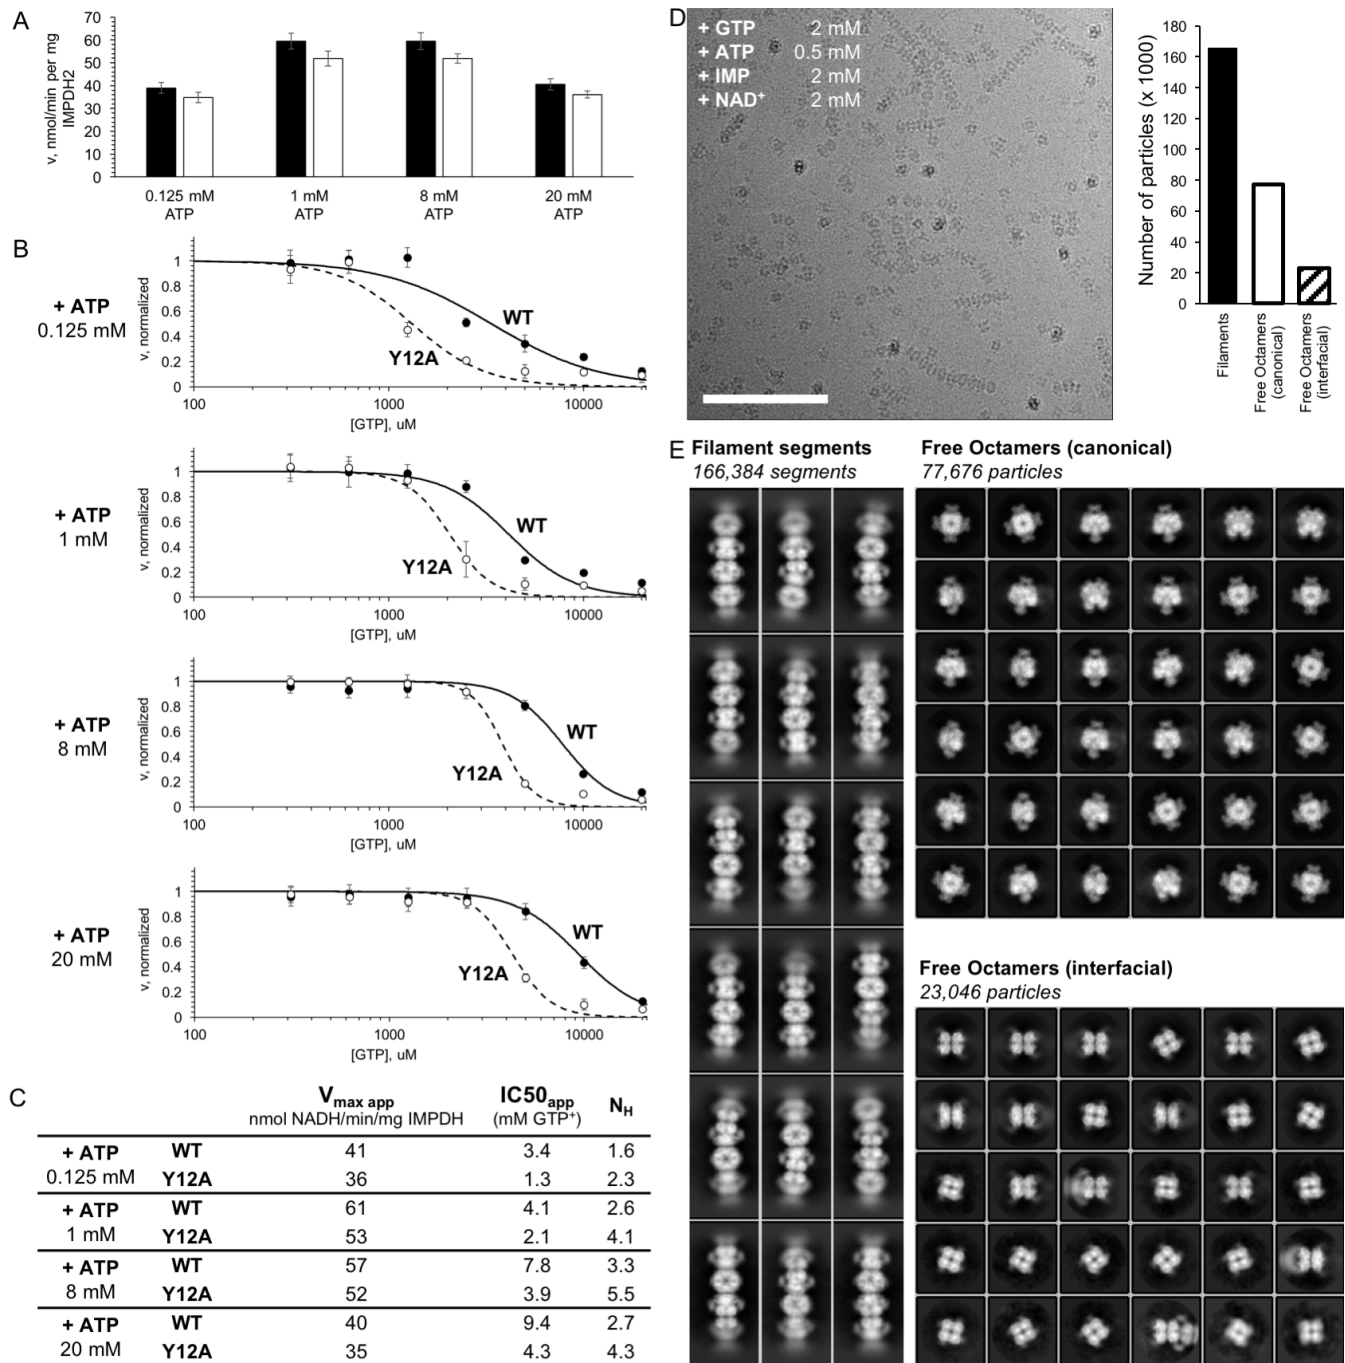

643

644

**Figure S8. IMPDH2 filaments resist GTP inhibition** Related to Figure 5. A) Initial reaction rates for uninhibited WT enzyme and the filament non-assembly mutant Y12A under various ATP concentrations. High concentrations of ATP likely inhibit by competing with co-substrate NAD<sup>+</sup>. B) Apparent GTP inhibition under saturating substrates (2 mM each IMP and NAD<sup>+</sup>) for a range of ATP concentrations. Under all conditions, WT was more resistant to GTP inhibition than Y12A. C) Estimated Hill equation parameters for data in panel B. D) Cryo-EM of partially inhibited IMPDH2 filaments. Enzyme treated with ATP, IMP, NAD<sup>+</sup>, and 2 mM GTP. Representative micrograph, 2944 total. Scale bar 100 nm. E) Representative 2D class averages of ATP/IMP/NAD<sup>+</sup>/[2mM]GTP cryo-EM dataset. Three particle types were observed: filament segments, canonical “face-to-face” free octamers, and interfacial “back-to-back” octamers.

653

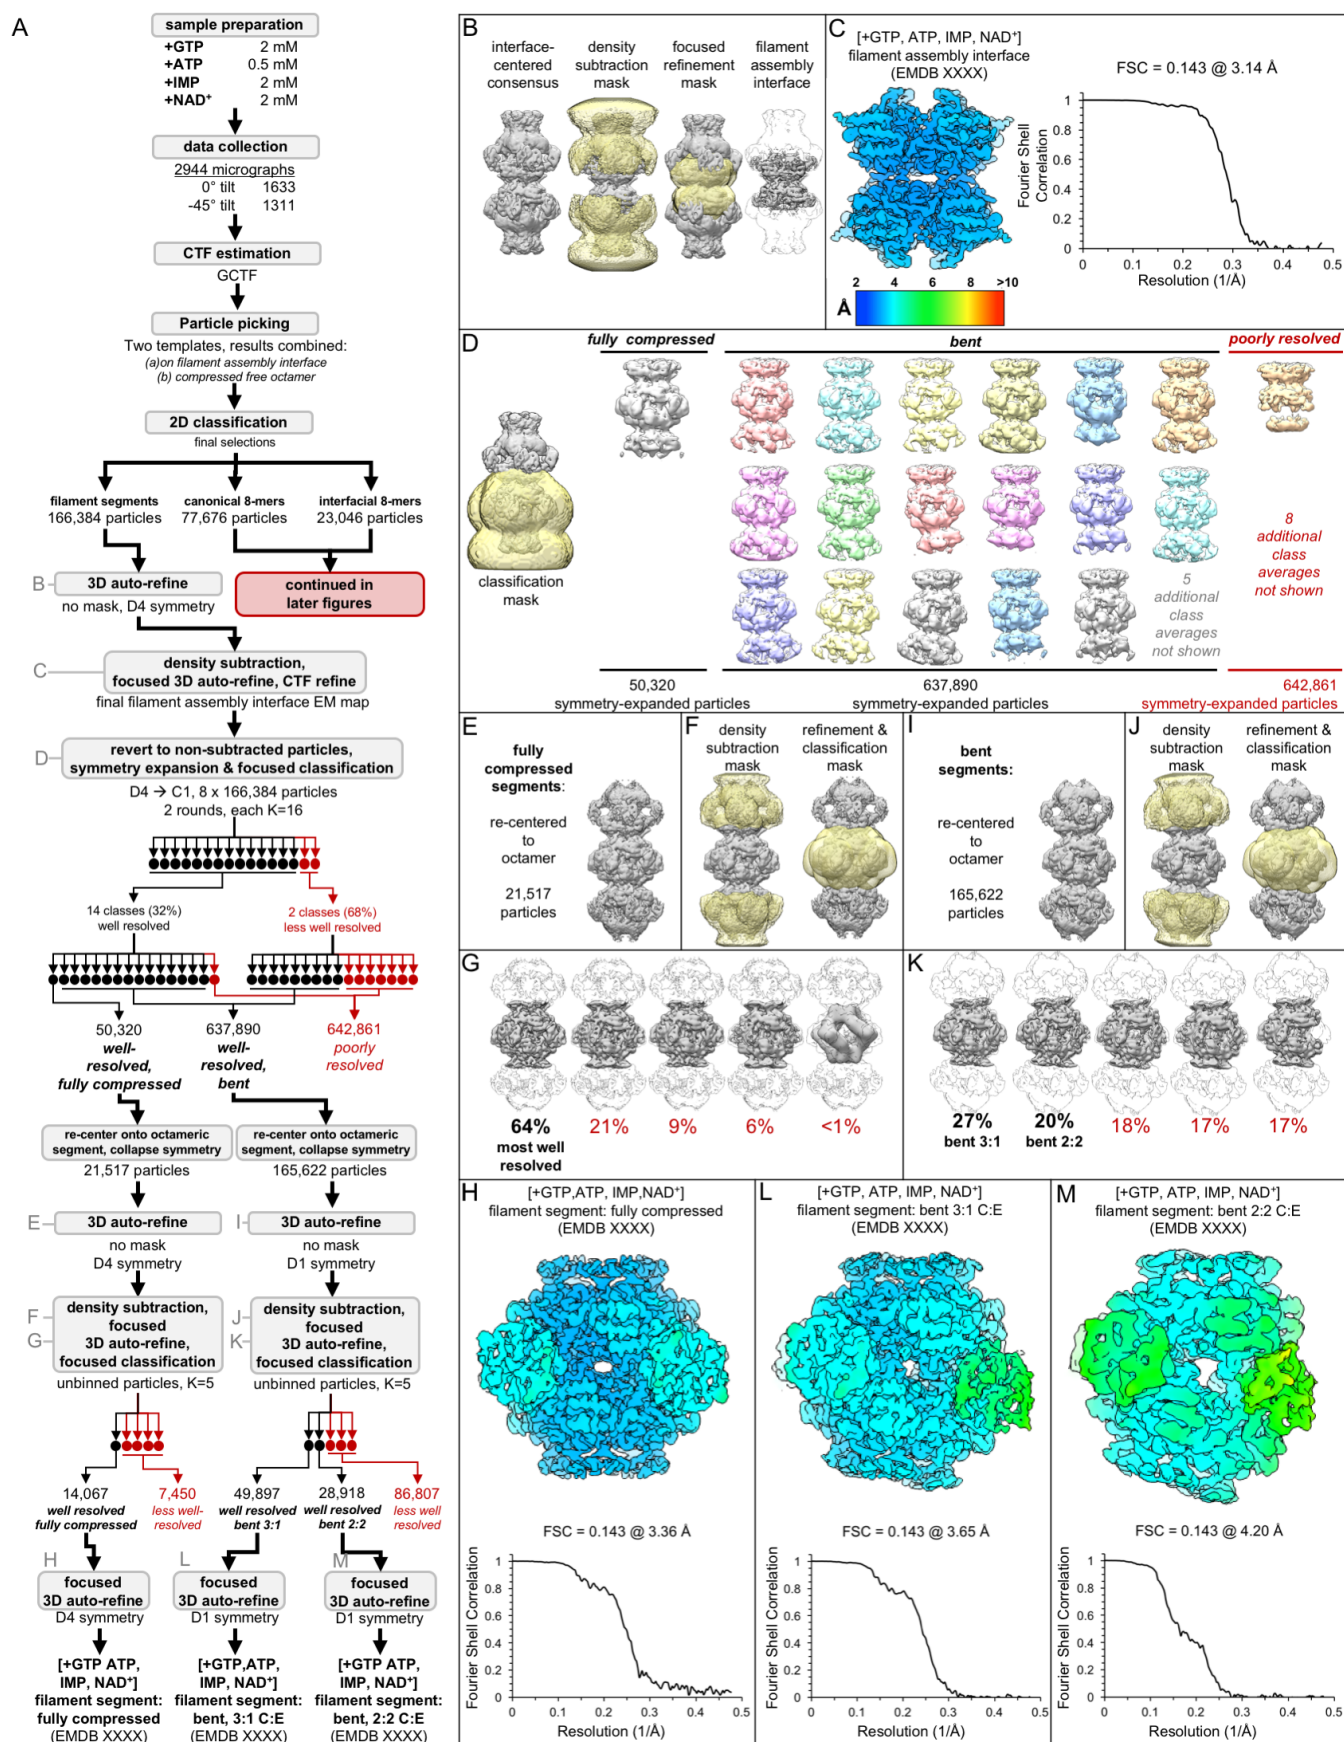

654

655

656

**Figure S9. Image processing of the IMPDH2 +ATP, IMP, NAD<sup>+</sup>, 2 mM GTP cryo-EM dataset, part 1: initial processing, and processing of filament segments. Related to Table 6. A) Flow chart**

657 summarizing data processing strategy. B) Density subtraction and focused refinement of the consensus  
 658 filament assembly interface. C) Local resolution estimation and FSC curve (via relion postprocessing) for  
 659 the ATP/IMP/NAD<sup>+</sup>/[2mM]GTP consensus filament assembly interface. D) Final class averages from  
 660 symmetry expanded classification of filament segments. E) Unmasked refinement from all fully  
 661 compressed segments, pooled and recentered. F) Masks used for continued processing of fully  
 662 compressed segments. G) Final classification of the best-resolved fully compressed filament segment  
 663 class H) Local resolution estimation and FSC curve for the ATP/IMP/NAD<sup>+</sup>/[2mM]GTP fully compressed  
 664 filament segment I-K) Same as E-G, but for the best-resolved ATP/IMP/NAD<sup>+</sup>/[2mM]GTP bent filament  
 665 segment. L-M) Local resolution estimation and FSC curves for the two different  
 666 ATP/IMP/NAD<sup>+</sup>/[2mM]GTP bent filament segments.

667

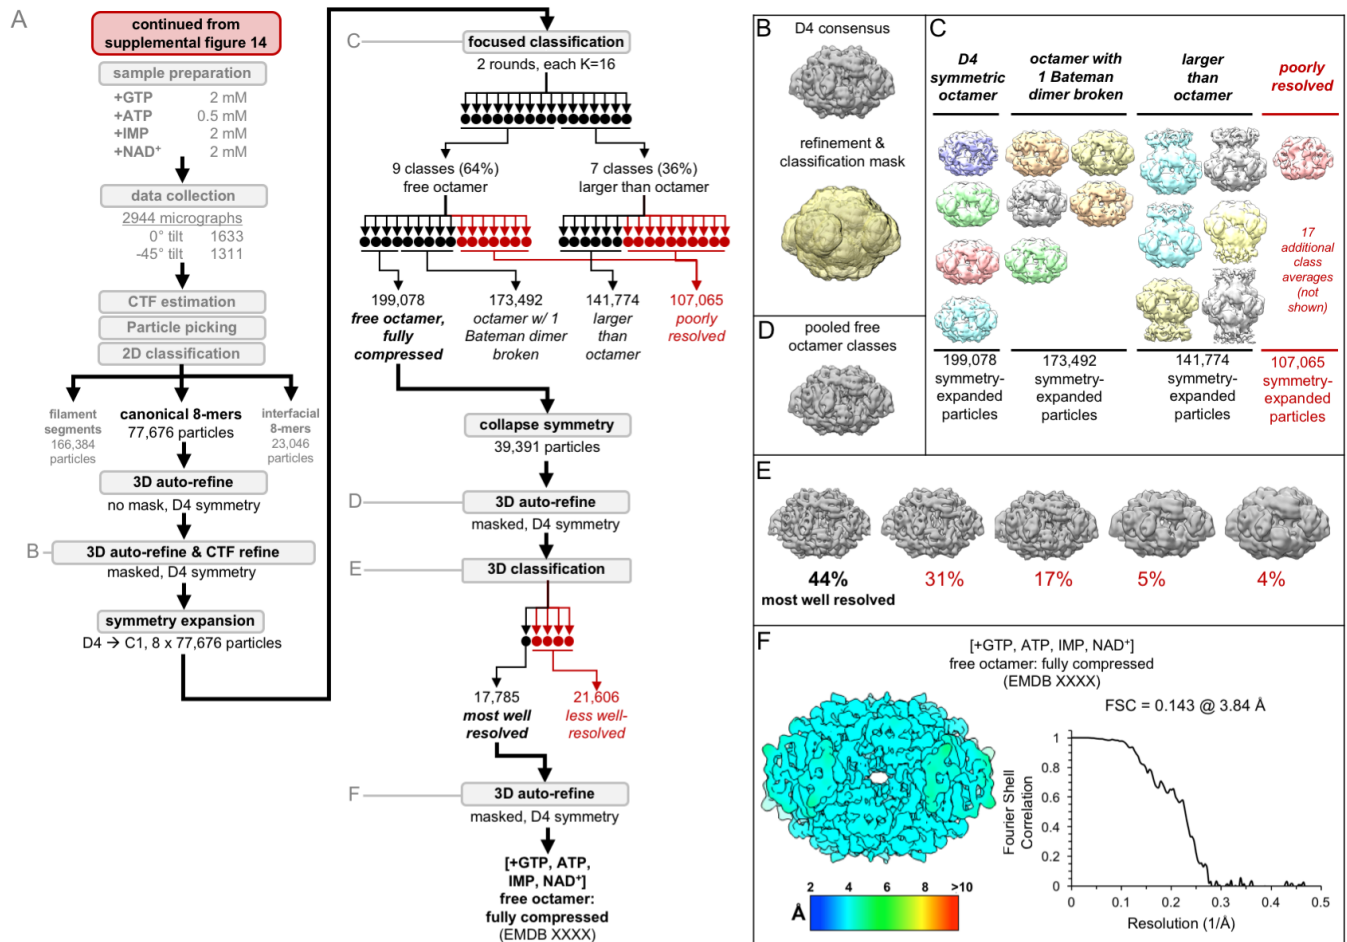

668

669 **Figure S10. Image processing of the IMPDH2 +ATP, IMP, NAD<sup>+</sup>, 2 mM GTP cryo-EM dataset, part**  
 670 **2: the free canonical octamers** Related to Table 6. A) Flow chart summarizing data processing  
 671 strategy. B) Masked 3D refinement and all particles from 2D classification/refinement consensus filament  
 672 assembly interface. Mask also used for all further processing. D4 symmetry enforced during refinement.  
 673 C) Final class averages from symmetry expanded classification of free octamers. D) Masked refinement  
 674 from all fully compressed free octamers. E) Final classification of the best-resolved fully compressed free



675 octamers H) Local resolution estimation and FSC curve for the ATP/IMP/NAD<sup>+</sup>/[2mM]GTP fully  
 676 compressed free canonical octamer.

677

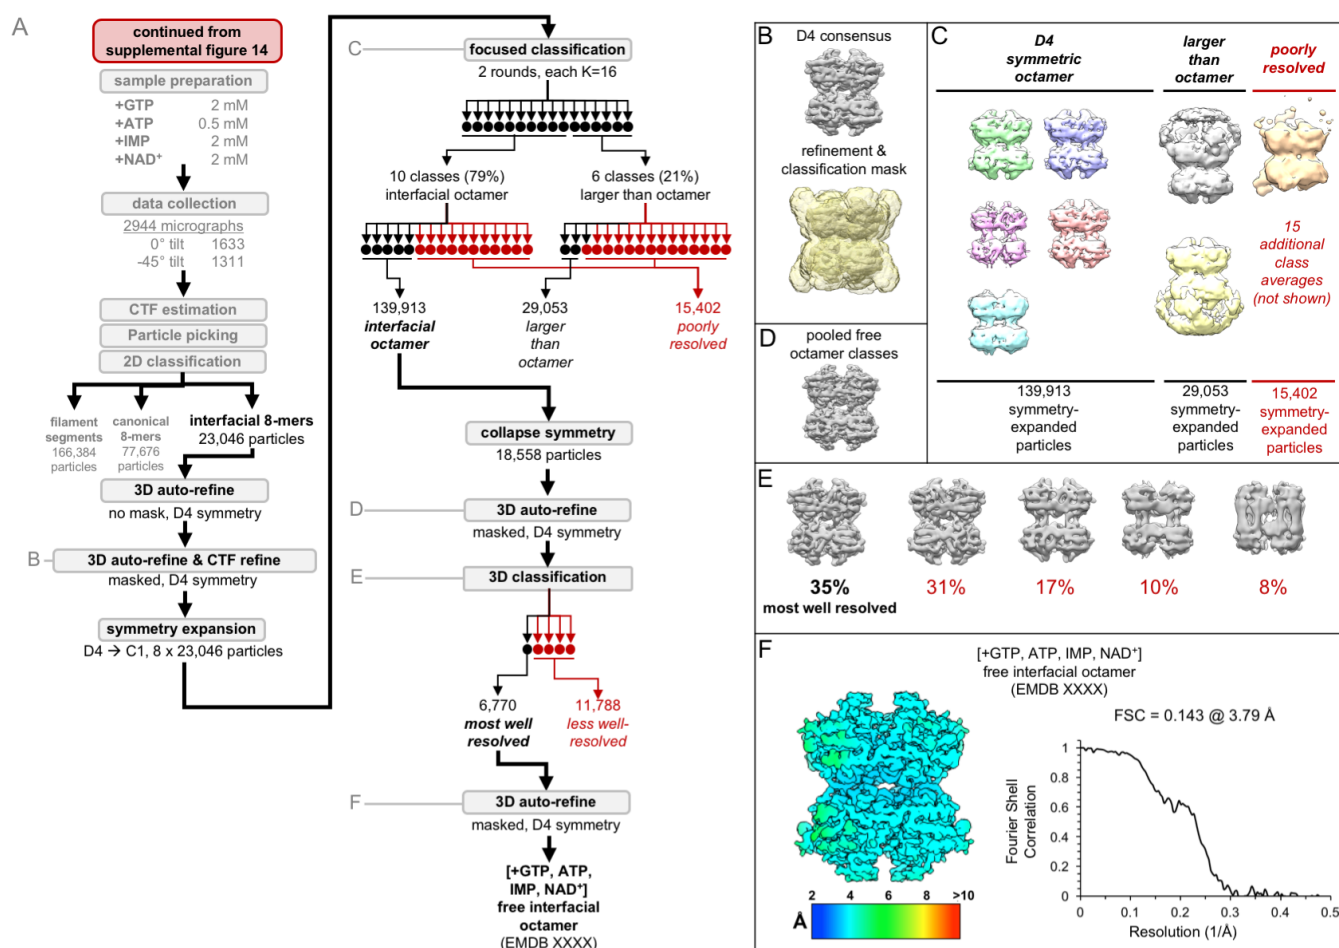

678

679 **Figure S11. Image processing of the IMPDH2 +ATP, IMP, NAD<sup>+</sup>, 2 mM GTP cryo-EM dataset, part**

680 **3: the free interfacial octamers** Related to Table 6. A) Flow chart summarizing data processing

681 strategy. B) Masked 3D refinement and all particles from 2D classification/refinement consensus filament

682 assembly interface. Mask also used for all further processing. D4 symmetry enforced during refinement.

683 C) Final class averages from symmetry expanded classification of free octamers. D) Masked refinement

684 from all fully compressed free octamers. E) Final classification of the best-resolved fully compressed free

685 octamers H) Local resolution estimation and FSC curve for the ATP/IMP/NAD<sup>+</sup>/[2mM]GTP free interfacial

686 octamer.

687

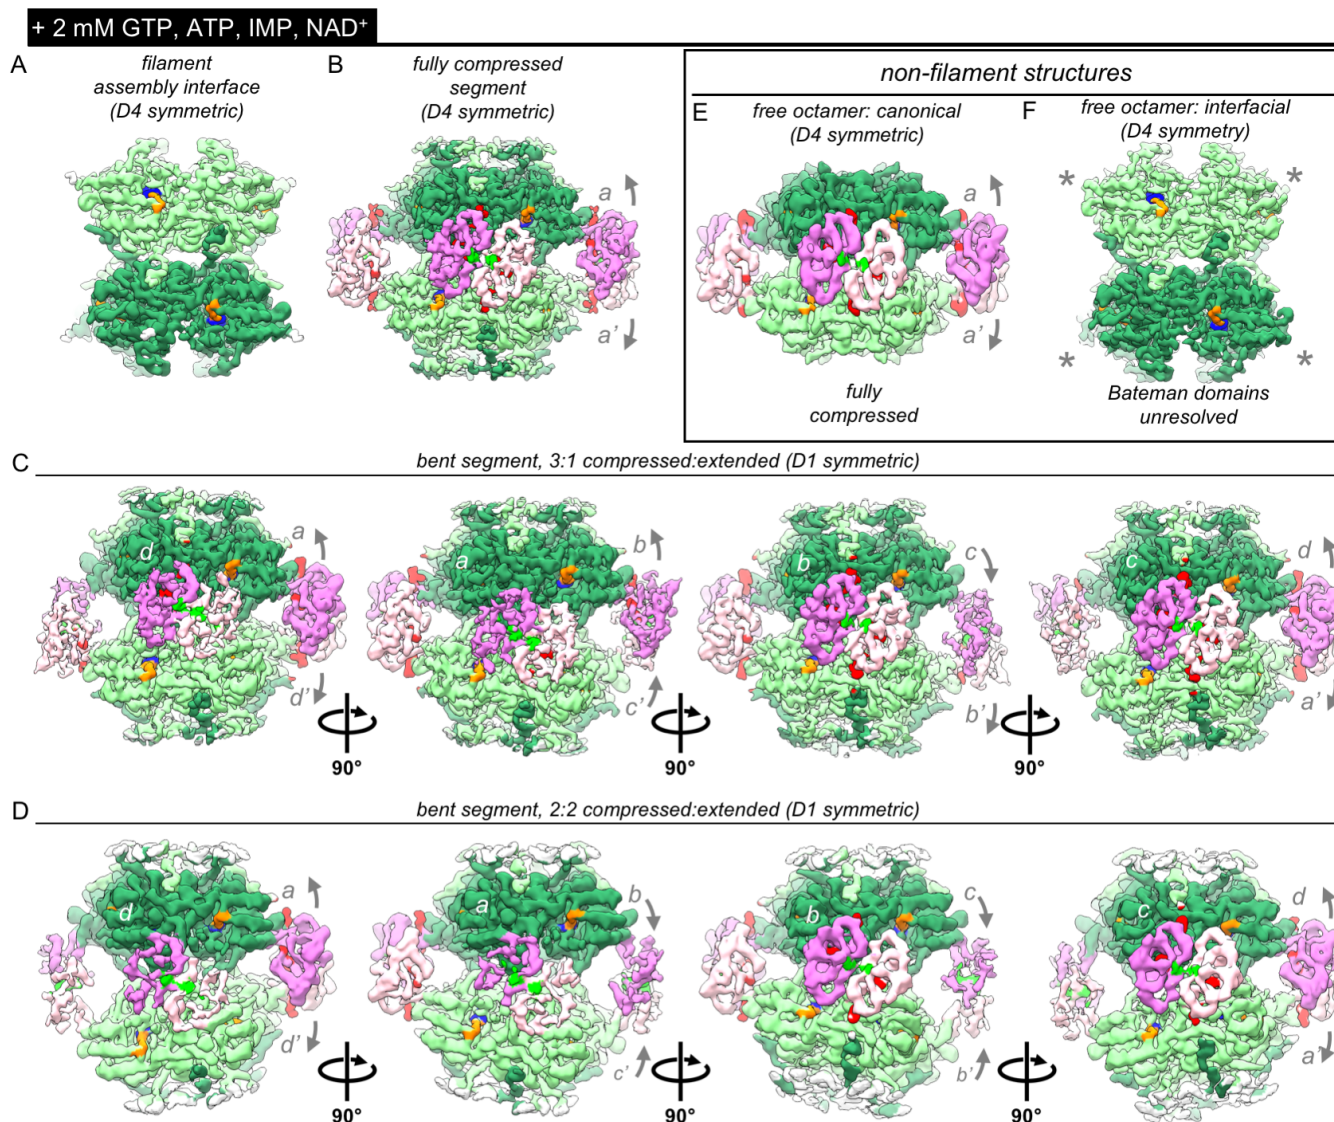

688

689 **Figure S12. Bateman domains of partially inhibited IMPDH2 filaments are in a mix of compressed**  
 690 **and extended states** Related to Figure 5. A) Cryo-EM density of the consensus filament assembly  
 691 interface from the ATP/IMP/NAD<sup>+</sup>/[2mM]GTP dataset, with density for bound IMP (blue), and NAD<sup>+</sup>  
 692 (orange). B) Cryo-EM density of the ATP/IMP/NAD<sup>+</sup>/[2mM]GTP fully compressed filament segment, with  
 693 (putative) ATP density in Bateman site 1 (bright green) and GTP in sites 2 and 3 (red). C-D) Two D1-  
 694 symmetric bent filament segments, with a mix of extended and bent protomers. The asymmetric unit of  
 695 each of these is a tetramer. E-F) Cryo-EM densities of the two different types of D4 symmetric non-  
 696 filament free octamers resolved from this dataset. The Bateman domains of the free interfacial octamer  
 697 were unresolved (gray asterisks).

698



699 **Methods**

700 ***Lead contact and materials availability***

701 Further information and requests for resources and reagents should be directed to and will be fulfilled by  
702 the Lead Contact, Justin Kollman ([jkoll@uw.edu](mailto:jkoll@uw.edu)).

703 ***Experimental model and subject details***

704 To express recombinant protein constructs, BL21 (DE3) cells acquired from Thermo Scientific were used.  
705 For protein purification, the cells were grown in LB broth at 37°C to an optical density of 0.8 and then  
706 induced with 1 mM IPTG. After induction, the cells were grown at 30°C for 4 hours. The cells were then  
707 harvested using centrifugation.

708 ***Method details***

709 ***Recombinant IMPDH expression and purification***

710 Purified hIMPDPH2 was prepared as described previously (Anthony et al. 2017). BL21 (DE3) *E. coli*  
711 transformed with a pSMT3-Kan vector expressing N-terminal SMT3/SUMO-tagged hIMPDPH2 were  
712 cultured in Luria broth at 37°C until reaching an OD<sub>600</sub> of 0.8 and then induced with 1 mM IPTG for 4  
713 hours at 30°C and pelleted. The remainder of purification was performed at 4°C. Pellets were  
714 resuspended in lysis buffer (50 mM KPO<sub>4</sub>, 300 mM KCl, 20 mM imidazole, 800 mM urea, pH 8) and lysed  
715 with an Emulsiflex-05 homogenizer. Lysate was cleared by centrifugation and SUMO-tagged hIMPDPH2  
716 chromatographically purified with HisTrap FF columns (GE Healthcare Life Sciences) and an Äkta Start  
717 chromatography system. After in-column washing with lysis buffer and elution (with 50 mM KPO<sub>4</sub>, 300  
718 mM KCl, 500 mM imidazole, pH 8), peak fractions were treated with 1 mg ULP 1 protease (Mossessova  
719 & Lima 2000) per 100 mg hIMPDPH2 for 1 hour, followed by the addition of 1 mM dithiothreitol (DTT) and  
720 800 mM urea. Protein was then concentrated using a 30,000 MWCO Amicon filter and subjected to size-  
721 exclusion chromatography using Äkta Pure system and a Superose 6 column pre-equilibrated in filtration  
722 buffer (20 mM HEPES, 100 mM KCl, 800 mM urea, 1 mM DTT, pH 8). Peak fractions were flash-frozen  
723 in liquid nitrogen and stored at -80°C.

724 ***IMPDH assembly***

725 Filaments (or, depending on ligand state, free octamers) were prepared by diluting aliquots of purified  
726 hIMPDPH2 in activity buffer (20 mM HEPES, 100 mM KCl, 1 mM DTT, pH 7) to 2 μM in the presence of  
727 varying concentrations of ATP, GTP, IMP, and/or NAD<sup>+</sup> and incubating for 30 minutes at 20°C.

728 ***IMPDH activity assays***

729 Protein aliquots were diluted in activity buffer and pre-treated with varying concentrations of ATP, GTP,  
730 and IMP for 30 minutes at 20°C, in 96 well UV transparent plates (Corning model 3635). Reactions (100  
731 uL total) were initiated by addition of varying concentrations of NAD<sup>+</sup>. NADH production was measured  
732 by optical absorbance (340 nm) in real-time using a Varioskan Lux microplate reader (Thermo Scientific)  
733 at 20°C, 1 measurement/min, for 20 minutes; absorbance was correlated with NADH concentration using  
734 a standard curve. Specific activity was calculated by linear interpretation of the reaction slope for a 5-  
735 minute window beginning 3 minutes after reaction initiation.

#### 736 *Negatively stained electron microscopy*

737 Protein preparations were applied to glow-discharged continuous carbon EM grids and negatively stained  
738 with 2% uranyl formate. Grids were imaged by transmission electron microscopy using an FEI Tecnai G2  
739 Spirit at 120kV acceleration voltage and a Gatan Ultrascan 4000 CCD using the Leginon software  
740 package (Suloway et al. 2009). Micrographs were collected at a nominal 67,000x magnification (pixel  
741 size 1.6 Å). GCTF was used for contrast transfer function (CTF) estimation, and Relion for particle picking  
742 and 2D classification (Zivanov et al. 2018; Zhang 2016; Scheres 2012).

#### 743 *Electron cryo-microscopy sample preparation and data collection*

744 Protein preparations were applied to glow-discharged C-flat holey carbon EM grids (Protochips), blotted,  
745 and plunge-frozen in liquid ethane using an Vitrobot plunging apparatus (FEI) at 20°C, 100% relative  
746 humidity. High-throughput data collection was performed using an FEI Titan Krios transmission electron  
747 microscope operating at 300 kV and equipped with a Gatan image filter (GIF) and post-GIF Gatan K2  
748 Summit direct electron detector using the Leginon software package (Suloway et al. 2009). For the two  
749 datasets with non-filament octamers of IMPDH, which exhibit a preferred orientation, it was necessary to  
750 collect images with the stage tilted in order to capture a sufficient range of views for 3D reconstruction  
751 (Figs. S6A, S9A).

#### 752 *Electron cryo-microscopy image processing*

753 Movies were collected in super-resolution mode, then aligned and corrected for beam-induced motion  
754 using Motioncor2, with 2X Fourier binning and dose compensation applied during motion correction  
755 (Suloway et al. 2009; Zheng et al. 2017). CTF was estimated using GCTF (Zhang 2016). Relion 3.0 was  
756 used for all subsequent image processing (Zhang 2016; Zivanov et al. 2018). Although multiple datasets  
757 of hIMPDPH2 under the different ligand states were collected, each dataset was individually processed  
758 using approximately the same overall pipeline (Figs. S1E-G), with some variations from dataset to dataset  
759 (Figs. S2, S5-6, S9-11). First, for each dataset, autopicking templates and initial 3D references maps  
760 were prepared by manually picking and extracting boxed particles from a small subset of micrographs,  
761 and classifying/refining in 2D and 3D. For these initial 3D refinements, a featureless, soft-edged cylinder

762 was used as a refinement template of filaments, and a previously published cryo-em map (EMDB-8692)  
763 was used as template for non-filament octamers (Anthony et al. 2017). Because IMPDH filament  
764 segments possess D4 point-group symmetry, two different locations along filaments may be used as  
765 symmetry origins: the centers of canonical octamer segments, or the centers of the assembly interface  
766 between segments. For the filament datasets, we prepared and used auto-picking templates centered on  
767 the filament assembly interface. For the datasets containing non-filament octamers of hIMPDPH2, auto-  
768 picking templates centered on these non-filament particles were also included. Due to the flexibility of  
769 hIMPDPH2 filaments, helical segments were processed as single particles, and at no point was helical  
770 symmetry applied during image processing. After template-based autopicking of each complete dataset,  
771 picked particles were boxed and extracted from micrographs, and subjected to hierarchical 2D  
772 classification to select the best-resolved classes. These selected particles were then auto-refined in 3D  
773 as a single class with symmetry applied (D4 for filament segments and free octamers, C4 for filament  
774 ends). Exploratory image processing of the assembly interface-centered filament reconstructions made  
775 it apparent that the eight catalytic domains surrounding this interface appeared conformationally  
776 homogenous, while the Bateman domains and neighboring octamers appeared conformationally varied.  
777 Additionally, due to the flexibility of the filaments, and the tendency of filament ends to adhere to the air-  
778 water interface, many filaments were tilted out of plane, with neighboring segments overlapping in  
779 projection.

780 To improve resolution, partial signal subtraction was performed at this stage, using a mask that left only  
781 the central eight catalytic domains of the filament assembly interface, subtracting the poorly resolved  
782 Bateman domains and neighboring segments, which served to improve resolution after subsequent auto-  
783 refinement. Per-particle defocus and per-micrograph astigmatism were then optimized using CTF  
784 refinement, which improved resolution further. The resulting consensus refinements of the filament  
785 assembly interfaces were well-resolved, however data on Bateman domain conformation was missing,  
786 with these regions very poorly resolved when subtracted regions were restored to the reconstructions by  
787 reversion to original non-subtracted particles (data not shown). To resolve the different Bateman domain  
788 conformations, we applied particle symmetry expansion (D4 to C1) and classified particles without  
789 additional alignment. Because at this stage the reconstructions were centered on the filament assembly  
790 interface, each boxed “particle” contained elements of two different neighboring octamers. The potential  
791 conformational space was reduced by applying a mask enclosing only one of these two octamers. By  
792 hierarchical focused classification of the off-origin octamers we were able to classify multiple  
793 conformations of the octameric filament segments, as well as incomplete segments and filament ends.  
794 Symmetry expansion was also applied to the non-filament octamer datasets, with a mask including the  
795 entire particle, which allowed classification of the most symmetric and well-resolved classes. To further  
796 improve resolution of the varying symmetry-expanded segment classes, the reconstruction symmetry  
797 origins were moved from the filament assembly interface to the canonical octamers by re-extraction with  
798 re-centering. For each class, symmetry was then collapsed by removing redundant overlapping particles,

799 Euler angles reset to zero. After auto-refining once again, we observed that the most well-resolved  
800 octameric segments from the asymmetric symmetry-expanded classifications exhibited some apparent  
801 symmetry, with fully extended or fully compressed octamers appearing D4 symmetric, and some bent  
802 classes apparently D1 symmetric. We therefore applied these symmetries during subsequent refinement  
803 and classification of these new octamer-centered classes. As before, signal subtraction of neighboring  
804 filament segments improved resolution considerably. Additional rounds of CTF refinement and 3D  
805 classification identified the best-resolved particles from each of these conformational classes. Final  
806 overall resolution (according to the FSC=0.143 criterion), as well as local resolution, was assessed using  
807 Relion postprocessing.

### 808 *Model building and refinement*

809 As initial templates for model building, two hybrid models (representing HIMPDPH2 in either an extended  
810 or compressed state) were prepared by combining elements from existing crystal structures. For both  
811 templates, the catalytic domain and substrate poses (residues 18-107, & 245-514) were taken from a  
812 crystal structure of an inhibitor-bound HIMPDPH2 (PDB 1nf7), and the Bateman domains and ligand poses  
813 (residues 108-244) were based on fungal (*A. gossypii*) IMPDH crystallized in either the extended or  
814 compressed states (PDB 5mcp and 5tc3, respectively), and SWISS-MODEL homology modeling  
815 (Sintchak et al. 1996; Waterhouse et al. 2018; Buey et al. 2017). The N-terminus (residues 1-17) were  
816 modelled by hand. In all maps, a single active site loop (residues 421 to 436) was unresolved, and these  
817 residues were not modelled. After rigid-body fitting of templates into the cryo-EM densities using UCSF  
818 Chimera, repeated cycles of manual fitting with Coot, automated fitting with phenix.real\_space\_refine  
819 (employing rigid-body refinement, NCS constraints, gradient-driven minimization and simulated  
820 annealing) and local B-factor sharpening of cryo-EM data via LocScale were used for final atomic model  
821 refinement and local sharpening of cryo-EM maps (Pettersen et al. 2004; Emsley et al. 2010; Adams et  
822 al. 2012; Jakobi et al. 2017). Final models were evaluated with MOLPROBITY and EMRinger (Chen et  
823 al. 2010; Barad et al. 2015). Data collection parameters and refinement statistics are summarized in  
824 Tables 1-6. Figures were prepared with UCSF Chimera (Pettersen et al. 2004).

### 825 ***Quantification and statistical analysis.***

826 Protein concentrations were assayed with a NanoDrop spectrophotometer (Thermo Scientific). NADH  
827 concentrations were assayed with a Varioskan Lux microplate reader (Thermo Scientific). Per-residue  
828 backbone RMSD values were calculated using superposed models in UCSF Chimera. All statistical  
829 validation performed on the deposited maps/models was done using Relion, PHENIX, MolProbity, and  
830 EMringer.

### 831 ***Data and code availability***

832 The cryo-EM maps described here have been deposited in the Electron Microscopy Data Bank with  
833 accession numbers 20687, 20688, 20690, 20691, 20701, 20704, 20705, 20706, 20707, 20709, 20716,  
834 20718, 20720, 20722, 20723, 20725, 20742, 20741, and 20743. The refined atomic coordinates have  
835 been deposited in the Protein Data Bank with accession numbers 6U8E, 6U8N, 6U8R, 6U8S, 6U9O,  
836 6UA2, 6UA4, 6UA5, 6UAJ, 6UC2, 6UDP, 6UDO, and 6UDQ.

837

## 838 **Supplemental Items**

839 **Video S1. Comparison between the “flat” tetramer of assembled filaments and the “bowed”**  
840 **tetramer of free octamers.** Related to Figure 4. Morph comparison between catalytic tetramers of the  
841 GTP/ATP/IMP filament assembly interface and the GTP/ATP free octamer. For visualization purposes,  
842 we have depicted the complete N-terminus in both conformations, however in the free octamer model,  
843 some residues were unresolved (gray). For both models, opposing tetramers, Bateman domains, and  
844 active site loops have been hidden from view.

845

## 846 **References**

- 847 Adams, P.D. et al., 2012. PHENIX: a comprehensive Python-based system for macromolecular structure  
848 solution. *International Tables for Crystallography*, pp.539–547.
- 849 Aherne, A. et al., 2004. On the molecular pathology of neurodegeneration in IMPDH1-based retinitis  
850 pigmentosa. *Human molecular genetics*, 13(6), pp.641–650.
- 851 Allison, A.C. & Eugui, E.M., 2000. Mycophenolate mofetil and its mechanisms of action.  
852 *Immunopharmacology*, 47(2-3), pp.85–118.
- 853 Anthony, S.A. et al., 2017. Reconstituted IMPDH polymers accommodate both catalytically active and  
854 inactive conformations. *Molecular biology of the cell*. Available at:  
855 <http://dx.doi.org/10.1091/mbc.E17-04-0263>.
- 856 Barad, B.A. et al., 2015. EMRinger: side chain-directed model and map validation for 3D cryo-electron  
857 microscopy. *Nature methods*, 12(10), pp.943–946.
- 858 Barry, R.M. et al., 2014. Large-scale filament formation inhibits the activity of CTP synthetase. *eLife*, 3,  
859 p.e03638.



- 860 Baykov, A.A., Tuominen, H.K. & Lahti, R., 2011. The CBS domain: a protein module with an emerging  
861 prominent role in regulation. *ACS chemical biology*, 6(11), pp.1156–1163.
- 862 Ben-Sahra, I. et al., 2016. mTORC1 induces purine synthesis through control of the mitochondrial  
863 tetrahydrofolate cycle. *Science*, 351(6274), pp.728–733.
- 864 Bergan, S., Bremer, S. & Vethe, N.T., 2016. Drug target molecules to guide immunosuppression. *Clinical*  
865 *biochemistry*, 49(4-5), pp.411–418.
- 866 Buey, R.M. et al., 2017. A nucleotide-controlled conformational switch modulates the activity of eukaryotic  
867 IMP dehydrogenases. *Scientific reports*, 7(1), p.2648.
- 868 Buey, R.M., Ledesma-Amaro, R., Velázquez-Campoy, A., et al., 2015. Guanine nucleotide binding to the  
869 Bateman domain mediates the allosteric inhibition of eukaryotic IMP dehydrogenases. *Nature*  
870 *communications*, 6, p.8923.
- 871 Buey, R.M., Ledesma-Amaro, R., Balsera, M., et al., 2015. Increased riboflavin production by  
872 manipulation of inosine 5'-monophosphate dehydrogenase in *Ashbya gossypii*. *Applied microbiology*  
873 *and biotechnology*, 99(22), pp.9577–9589.
- 874 Calise, S.J. et al., 2014. Glutamine deprivation initiates reversible assembly of mammalian rods and  
875 rings. *Cellular and molecular life sciences: CMLS*, 71(15), pp.2963–2973.
- 876 Calise, S.J. et al., 2018. Immune Response-Dependent Assembly of IMP Dehydrogenase Filaments.  
877 *Frontiers in immunology*, 9, p.2789.
- 878 Carr, S.F. et al., 1993. Characterization of human type I and type II IMP dehydrogenases. *The Journal of*  
879 *biological chemistry*, 268(36), pp.27286–27290.
- 880 Chang, C.-C. et al., 2015. Cytoophidium assembly reflects upregulation of IMPDH activity. *Journal of Cell*  
881 *Science*, 128(19), pp.3550–3555.
- 882 Chen, V.B. et al., 2010. MolProbity: all-atom structure validation for macromolecular crystallography. *Acta*  
883 *crystallographica. Section D, Biological crystallography*, 66(Pt 1), pp.12–21.
- 884 Collart, F.R. & Huberman, E., 1988. Cloning and sequence analysis of the human and Chinese hamster  
885 inosine-5'-monophosphate dehydrogenase cDNAs. *The Journal of biological chemistry*, 263(30),  
886 pp.15769–15772.
- 887 Duong-Ly, K.C. et al., 2018. T cell activation triggers reversible inosine-5'-monophosphate  
888 dehydrogenase assembly. *Journal of Cell Science*, 131(17), p.jcs223289.

- 889 Emsley, P. et al., 2010. Features and development of Coot. *Acta crystallographica. Section D, Biological*  
890 *crystallography*, 66(Pt 4), pp.486–501.
- 891 Ereño-Orbea, J., Oyenarte, I. & Martínez-Cruz, L.A., 2013. CBS domains: Ligand binding sites and  
892 conformational variability. *Archives of biochemistry and biophysics*, 540(1-2), pp.70–81.
- 893 Fernández-Justel, D. et al., 2019. A Nucleotide-Dependent Conformational Switch Controls the  
894 Polymerization of Human IMP Dehydrogenases to Modulate their Catalytic Activity. *Journal of*  
895 *molecular biology*, 431(5), pp.956–969.
- 896 Gu, J.J. et al., 2000. Inhibition of T lymphocyte activation in mice heterozygous for loss of the IMPDH II  
897 gene. *The Journal of clinical investigation*, 106(4), pp.599–606.
- 898 Gu, J.J. et al., 2003. Targeted disruption of the inosine 5'-monophosphate dehydrogenase type I gene in  
899 mice. *Molecular and cellular biology*, 23(18), pp.6702–6712.
- 900 Hager, P.W. et al., 1995. Recombinant human inosine monophosphate dehydrogenase type I and type  
901 II proteins. Purification and characterization of inhibitor binding. *Biochemical pharmacology*, 49(9),  
902 pp.1323–1329.
- 903 Hedstrom, L., 2009. IMP dehydrogenase: structure, mechanism, and inhibition. *Chemical reviews*,  
904 109(7), pp.2903–2928.
- 905 He, Y. et al., 2018. Over-expression of IMPDH2 is associated with tumor progression and poor prognosis  
906 in hepatocellular carcinoma. *American journal of cancer research*, 8(8), pp.1604–1614.
- 907 Huang, F. et al., 2018. Inosine Monophosphate Dehydrogenase Dependence in a Subset of Small Cell  
908 Lung Cancers. *Cell Metabolism*, 28(3), pp.369–382.e5.
- 909 Hunkeler, M. et al., 2018. Structural basis for regulation of human acetyl-CoA carboxylase. *Nature*,  
910 558(7710), pp.470–474.
- 911 Ignoul, S. & Eggermont, J., 2005. CBS domains: structure, function, and pathology in human proteins.  
912 *American journal of physiology. Cell physiology*, 289(6), pp.C1369–78.
- 913 Ingerson-Mahar, M. et al., 2010. The metabolic enzyme CTP synthase forms cytoskeletal filaments.  
914 *Nature cell biology*, 12(8), pp.739–746.
- 915 Jackson, R.C., Weber, G. & Morris, H.P., 1975. IMP dehydrogenase, an enzyme linked with proliferation  
916 and malignancy. *Nature*, 256(5515), pp.331–333.

- 917 Jakobi, A.J., Wilmanns, M. & Sachse, C., 2017. Model-based local density sharpening of cryo-EM maps.  
918 *eLife*, 6. Available at: <http://dx.doi.org/10.7554/eLife.27131>.
- 919 Ji, Y. et al., 2006. Regulation of the interaction of inosine monophosphate dehydrogenase with  
920 mycophenolic Acid by GTP. *The Journal of biological chemistry*, 281(1), pp.206–212.
- 921 Juda, P. et al., 2014. Ultrastructure of cytoplasmic and nuclear inosine-5'-monophosphate  
922 dehydrogenase 2 “rods and rings” inclusions. *The journal of histochemistry and cytochemistry:*  
923 *official journal of the Histochemistry Society*, 62(10), pp.739–750.
- 924 Keppeke, G.D. et al., 2015. Assembly of IMPDH2-based, CTPS-based, and mixed rod/ring structures is  
925 dependent on cell type and conditions of induction. *Journal of genetics and genomics = Yi chuan*  
926 *xue bao*, 42(6), pp.287–299.
- 927 Keppeke, G.D. et al., 2018. IMP/GTP balance modulates cytoophidium assembly and IMPDH activity.  
928 *Cell division*, 13, p.5.
- 929 Kim, Y. et al., 2017. Crystal Structure of the Catalytic Domain of the Inosine Monophosphate  
930 Dehydrogenase from *Bacillus anthracis* in the complex with IMP and the inhibitor P200. Available at:  
931 <http://dx.doi.org/10.2210/pdb5uuz/pdb>.
- 932 Labesse, G. et al., 2013. MgATP regulates allostery and fiber formation in IMPDHs. *Structure* , 21(6),  
933 pp.975–985.
- 934 Lane, A.N. & Fan, T.W.M., 2015. Regulation of mammalian nucleotide metabolism and biosynthesis.  
935 *Nucleic Acids Research*, 43(4), pp.2466–2485.
- 936 Liao, L.-X. et al., 2017. Highly selective inhibition of IMPDH2 provides the basis of antineuroinflammation  
937 therapy. *Proceedings of the National Academy of Sciences of the United States of America*, 114(29),  
938 pp.E5986–E5994.
- 939 Lynch, E.M. et al., 2017. Human CTP synthase filament structure reveals the active enzyme  
940 conformation. *Nature structural & molecular biology*, 24(6), pp.507–514.
- 941 Makowska-Grzyska, M. et al., 2015. Mycobacterium tuberculosis IMPDH in Complexes with Substrates,  
942 Products and Antitubercular Compounds. *PloS one*, 10(10), p.e0138976.
- 943 Mossessova, E. & Lima, C.D., 2000. Ulp1-SUMO crystal structure and genetic analysis reveal conserved  
944 interactions and a regulatory element essential for cell growth in yeast. *Molecular cell*, 5(5), pp.865–  
945 876.

- 946 Nagai, M. et al., 1991. Selective up-regulation of type II inosine 5'-monophosphate dehydrogenase  
947 messenger RNA expression in human leukemias. *Cancer research*, 51(15), pp.3886–3890.
- 948 Narayanaswamy, R. et al., 2009. Widespread reorganization of metabolic enzymes into reversible  
949 assemblies upon nutrient starvation. *Proceedings of the National Academy of Sciences of the United*  
950 *States of America*, 106(25), pp.10147–10152.
- 951 Natsumeda, Y. et al., 1990. Two distinct cDNAs for human IMP dehydrogenase. *The Journal of biological*  
952 *chemistry*, 265(9), pp.5292–5295.
- 953 Noree, C. et al., 2010. Identification of novel filament-forming proteins in *Saccharomyces cerevisiae* and  
954 *Drosophila melanogaster*. *The Journal of cell biology*, 190(4), pp.541–551.
- 955 O'Connell, J.D. et al., 2012. Dynamic reorganization of metabolic enzymes into intracellular bodies.  
956 *Annual review of cell and developmental biology*, 28, pp.89–111.
- 957 Osipiuk, J. et al., 2014. Inosine 5'-monophosphate dehydrogenase from *Vibrio cholerae*, deletion mutant,  
958 in complex with XMP and NAD. Available at: <http://dx.doi.org/10.2210/pdb4x3z/pdb>.
- 959 Petrovska, I. et al., 2014. Filament formation by metabolic enzymes is a specific adaptation to an  
960 advanced state of cellular starvation. *eLife*, 3. Available at: <http://dx.doi.org/10.7554/elife.02409>.
- 961 Pettersen, E.F. et al., 2004. UCSF Chimera--a visualization system for exploratory research and analysis.  
962 *Journal of computational chemistry*, 25(13), pp.1605–1612.
- 963 Prorise, G.L. & Luecke, H., 2003. Crystal structures of *Tritrichomonas foetus* inosine monophosphate  
964 dehydrogenase in complex with substrate, cofactor and analogs: a structural basis for the random-  
965 in ordered-out kinetic mechanism. *Journal of molecular biology*, 326(2), pp.517–527.
- 966 Saad, S. et al., 2017. Reversible protein aggregation is a protective mechanism to ensure cell cycle  
967 restart after stress. *Nature cell biology*, 19(10), pp.1202–1213.
- 968 Scheres, S.H.W., 2012. RELION: implementation of a Bayesian approach to cryo-EM structure  
969 determination. *Journal of structural biology*, 180(3), pp.519–530.
- 970 Schiavon, C.R. et al., 2018. Compositional complexity of rods and rings. *Molecular biology of the cell*,  
971 29(19), pp.2303–2316.
- 972 Scott, J.W. et al., 2004. CBS domains form energy-sensing modules whose binding of adenosine ligands  
973 is disrupted by disease mutations. *The Journal of clinical investigation*, 113(2), pp.274–284.

- 974 Senda, M. & Natsumeda, Y., 1994. Tissue-differential expression of two distinct genes for human IMP  
975 dehydrogenase (E.C.1.1.1.205). *Life sciences*, 54(24), pp.1917–1926.
- 976 Shen, Q.-J. et al., 2016. Filamentation of Metabolic Enzymes in *Saccharomyces cerevisiae*. *Journal of*  
977 *genetics and genomics = Yi chuan xue bao*, 43(6), pp.393–404.
- 978 Shu, Q. & Nair, V., 2008. Inosine monophosphate dehydrogenase (IMPDH) as a target in drug discovery.  
979 *Medicinal Research Reviews*, 28(2), pp.219–232. Available at: <http://dx.doi.org/10.1002/med.20104>.
- 980 Sintchak, M.D. et al., 1996. Structure and mechanism of inosine monophosphate dehydrogenase in  
981 complex with the immunosuppressant mycophenolic acid. *Cell*, 85(6), pp.921–930.
- 982 Smith, J.L., 1998. Glutamine PRPP amidotransferase: snapshots of an enzyme in action. *Current opinion*  
983 *in structural biology*, 8(6), pp.686–694.
- 984 Stoddard, P.R. et al., 2019. Independent evolution of polymerization in the Actin ATPase clan regulates  
985 hexokinase activity. *bioRxiv*, p.686915. Available at:  
986 <https://www.biorxiv.org/content/10.1101/686915v1.abstract> [Accessed October 3, 2019].
- 987 Suloway, C. et al., 2009. Fully automated, sequential tilt-series acquisition with Legikon. *Journal of*  
988 *structural biology*, 167(1), pp.11–18.
- 989 Thomas, E.C. et al., 2012. Different characteristics and nucleotide binding properties of inosine  
990 monophosphate dehydrogenase (IMPDH) isoforms. *PloS one*, 7(12), p.e51096.
- 991 Trapero, A. et al., 2018. Fragment-Based Approach to Targeting Inosine-5'-monophosphate  
992 Dehydrogenase (IMPDH) from *Mycobacterium tuberculosis*. *Journal of medicinal chemistry*, 61(7),  
993 pp.2806–2822.
- 994 Traut, T.W., 1994. Physiological concentrations of purines and pyrimidines. *Molecular and Cellular*  
995 *Biochemistry*, 140(1), pp.1–22.
- 996 Tressler, R.J., Garvin, L.J. & Slate, D.L., 1994. Anti-tumor activity of mycophenolate mofetil against  
997 human and mouse tumors in vivo. *International Journal of Cancer*, 57(4), pp.568–573.
- 998 Waterhouse, A. et al., 2018. SWISS-MODEL: homology modelling of protein structures and complexes.  
999 *Nucleic acids research*, 46(W1), pp.W296–W303.
- 1000 Webb, B. et al., 2018. The Glycolytic Enzyme Phosphofructokinase-1 Assembles into Filaments.  
1001 *Biophysical Journal*, 114(3), p.228a.



- 1002 Wolfe, K. et al., 2019. Dynamic compartmentalization of purine nucleotide metabolic enzymes at leading  
1003 edge in highly motile renal cell carcinoma. *Biochemical and biophysical research communications*,  
1004 516(1), pp.50–56.
- 1005 Yalowitz, J.A. & Jayaram, H.N., 2000. Molecular targets of guanine nucleotides in differentiation,  
1006 proliferation and apoptosis. *Anticancer research*, 20(4), pp.2329–2338.
- 1007 Zhang, K., 2016. Gctf: Real-time CTF determination and correction. *Journal of structural biology*, 193(1),  
1008 pp.1–12.
- 1009 Zhao, H. et al., 2013. The purinosome, a multi-protein complex involved in the de novo biosynthesis of  
1010 purines in humans. *Chemical communications*, 49(40), pp.4444–4452.
- 1011 Zheng, S.Q. et al., 2017. MotionCor2: anisotropic correction of beam-induced motion for improved cryo-  
1012 electron microscopy. *Nature methods*, 14(4), pp.331–332.
- 1013 Zimmermann, A.G. et al., 1998. Inosine-5'-Monophosphate Dehydrogenase: Regulation of Expression  
1014 and Role in Cellular Proliferation and T Lymphocyte Activation. *Progress in Nucleic Acid Research  
1015 and Molecular Biology*, pp.181–209.
- 1016 Zivanov, J. et al., 2018. New tools for automated high-resolution cryo-EM structure determination in  
1017 RELION-3. *eLife*, 7. Available at: <http://dx.doi.org/10.7554/eLife.42166>.
- 1018 Zivanov, J. et al., 2018. New tools for automated high-resolution cryo-EM structure determination in  
1019 RELION-3. *eLife*, 7. Available at: <http://dx.doi.org/10.7554/eLife.42166>.
- 1020
